# Supplementary material for: Synthesis, and the antioxidant, neuroprotective and P-glycoprotein induction activity of 4-arylquinoline-2-carboxylates
Source: Royal Society of Chemistry journal article supplement (doi:10.1039/c4ob00488d), 2014-01-01
Supplement: c4ob00488d1.pdf [file c4ob00488d1.pdf]

## Electronic Supporting Information (ESI)

# Synthesis, antioxidant, neuroprotective and P-glycoprotein induction activity of 4-arylquinoline-2-carboxylates<sup>□</sup>

**Jaideep B. Bharate,<sup>a,b</sup> Abubakar Wani,<sup>c</sup> Sadhana Sharma,<sup>c</sup> Shahi Imam Reja,<sup>d</sup> Manoj Kumar,<sup>d</sup> Ram A. Vishwakarma<sup>a,b,\*</sup> Ajay Kumar,<sup>c,\*</sup> and Sandip B. Bharate<sup>a,b,\*</sup>**

<sup>a</sup>Medicinal Chemistry Division, Indian Institute of Integrative Medicine (CSIR), Canal Road, Jammu-180001, India

<sup>b</sup>Academy of Scientific & Innovative Research (AcSIR), Indian Institute of Integrative Medicine (CSIR), Canal Road, Jammu-180001, India

<sup>c</sup>Cancer Pharmacology Division, Indian Institute of Integrative Medicine (CSIR), Canal Road, Jammu-180001, India

<sup>d</sup>Department of Chemistry, Guru Nanak Dev University (GNDU), Amritsar- 143005, India.

\*E-mail: [sbharate@iiim.res.in](mailto:sbharate@iiim.res.in) (SBB);

[ajaykmahajan@hotmail.com](mailto:ajaykmahajan@hotmail.com) (AK);

[ram@iiim.res.in](mailto:ram@iiim.res.in) (RAV)

Fax: +91-191-2569333; Tel: +91-191-2569111

<sup>□</sup> IIIM Publication number IIIM/1669/2014

## CONTENTS

| Sr. No.   | Title                                                                                                                                                                      | Page no |
|-----------|----------------------------------------------------------------------------------------------------------------------------------------------------------------------------|---------|
| <b>S1</b> | <b>Spectral data scans of all compounds</b>                                                                                                                                | S4-S43  |
| S1.a.     | <sup>1</sup> H, <sup>13</sup> C and DEPT-135 NMR spectrum of ethyl 6-methoxy-4-phenylquinoline-2-carboxylate ( <b>1a</b> )                                                 | S4      |
| S1.b.     | <sup>1</sup> H, <sup>13</sup> C and DEPT-135 NMR spectrum of ethyl 6-methoxy-4-p-tolylquinoline-2-carboxylate ( <b>1b</b> )                                                | S6      |
| S1.c.     | <sup>1</sup> H, <sup>13</sup> C and DEPT-135 NMR spectrum of ethyl 6-methoxy-4-(thiophen-3-yl)quinoline-2-carboxylate ( <b>1c</b> )                                        | S8      |
| S1.d.     | <sup>1</sup> H, <sup>13</sup> C, DEPT-135 and <sup>19</sup> F NMR spectrum of ethyl 4-(4-(trifluoromethyl)phenyl)-6-methoxyquinoline-2-carboxylate ( <b>1d</b> )           | S10     |
| S1.e.     | <sup>1</sup> H, <sup>13</sup> C and DEPT-135 NMR spectrum of ethyl 4-(4-tert-butylphenyl)-6-methoxyquinoline-2-carboxylate ( <b>1e</b> )                                   | S12     |
| S1.f.     | <sup>1</sup> H, <sup>13</sup> C and DEPT-135 NMR spectrum of ethyl 4-(4-bromophenyl)-6-methoxyquinoline-2-carboxylate ( <b>1f</b> )                                        | S14     |
| S1.g.     | <sup>1</sup> H, <sup>13</sup> C and DEPT-135 NMR spectrum of ethyl 6-methoxy-4-(4-methoxyphenyl)quinoline-2-carboxylate ( <b>1g</b> )                                      | S16     |
| S1.h.     | <sup>1</sup> H, <sup>13</sup> C and DEPT-135 NMR spectrum of ethyl 6-methoxy-4-m-tolylquinoline-2-carboxylate ( <b>1h</b> )                                                | S18     |
| S2.a.     | <sup>1</sup> H, <sup>13</sup> C and DEPT-135 NMR spectrum of ethyl 8-phenyl-[1,3]dioxolo[4,5-g]quinoline-6-carboxylate ( <b>1i</b> )                                       | S20     |
| S2.b.     | <sup>1</sup> H, <sup>13</sup> C and DEPT-135 NMR spectrum of ethyl 8-p-tolyl-[1,3]dioxolo[4,5-g]quinoline-6-carboxylate ( <b>1j</b> )                                      | S22     |
| S2.c.     | <sup>1</sup> H, <sup>13</sup> C, DEPT-135 and <sup>19</sup> F NMR spectrum of ethyl 8-(4-(trifluoromethyl)phenyl)-[1,3]dioxolo[4,5-g]quinoline-6-carboxylate ( <b>1k</b> ) | S24     |
| S2.d.     | <sup>1</sup> H, <sup>13</sup> C and DEPT-135 NMR spectrum of ethyl 8-m-tolyl-[1,3]dioxolo[4,5-                                                                             | S26     |

|           |                                                                                                                                                            |     |
|-----------|------------------------------------------------------------------------------------------------------------------------------------------------------------|-----|
|           | g]quinoline-6-carboxylate ( <b>1l</b> )                                                                                                                    |     |
| S2.e.     | <sup>1</sup> H, <sup>13</sup> C and DEPT-135 NMR spectrum of ethyl 8-(3-chlorophenyl)-[1,3]dioxolo[4,5-g]quinoline-6-carboxylate ( <b>1m</b> )             | S28 |
| S2.f.     | <sup>1</sup> H, <sup>13</sup> C and DEPT-135 NMR spectrum of ethyl 8-(4-ethynylphenyl)-[1,3]dioxolo[4,5-g]quinoline-6-carboxylate ( <b>1n</b> )            | S30 |
| S2.g.     | <sup>1</sup> H, <sup>13</sup> C and DEPT-135 NMR spectrum of ethyl 8-(4-(trifluoromethoxy)phenyl)-[1,3]dioxolo[4,5-g]quinoline-6-carboxylate ( <b>1o</b> ) | S32 |
| S3.a.     | <sup>1</sup> H, <sup>13</sup> C and DEPT-135 NMR spectrum of ethyl 6,7-dimethoxy-4-phenylquinoline-2-carboxylate ( <b>1p</b> )                             | S34 |
| S3.b.     | <sup>1</sup> H, <sup>13</sup> C and DEPT-135 NMR spectrum of ethyl 4-(3-chlorophenyl)-6,7-dimethoxyquinoline-2-carboxylate ( <b>1q</b> )                   | S36 |
| S4.a.     | <sup>1</sup> H, <sup>13</sup> C and DEPT-135 NMR spectrum of ethyl 6-(benzyloxy)-4-phenylquinoline-2-carboxylate ( <b>1r</b> )                             | S38 |
| S4.b.     | <sup>1</sup> H, <sup>13</sup> C and DEPT-135 NMR spectrum of ethyl 6-(benzyloxy)-4-(3-chlorophenyl)quinoline-2-carboxylate ( <b>1s</b> )                   | S40 |
| S4.c.     | <sup>1</sup> H, <sup>13</sup> C, DEPT-135 and <sup>19</sup> F NMR spectrum of ethyl 6-(benzyloxy)-4-(4-fluorophenyl)quinoline-2-carboxylate ( <b>1t</b> )  | S42 |
| <b>S2</b> | <b>Redox potential measurement of compound 1o</b>                                                                                                          | S44 |
| <b>S3</b> | <b>LCMS analysis of the reaction mixture</b>                                                                                                               | S46 |

## S1. SPECTRAL DATA SCANS OF ALL COMPOUNDS

### S1.a. <sup>1</sup>H, <sup>13</sup>C and DEPT-135 NMR spectrum of ethyl 6-methoxy-4-phenylquinoline-2-carboxylate (1a)

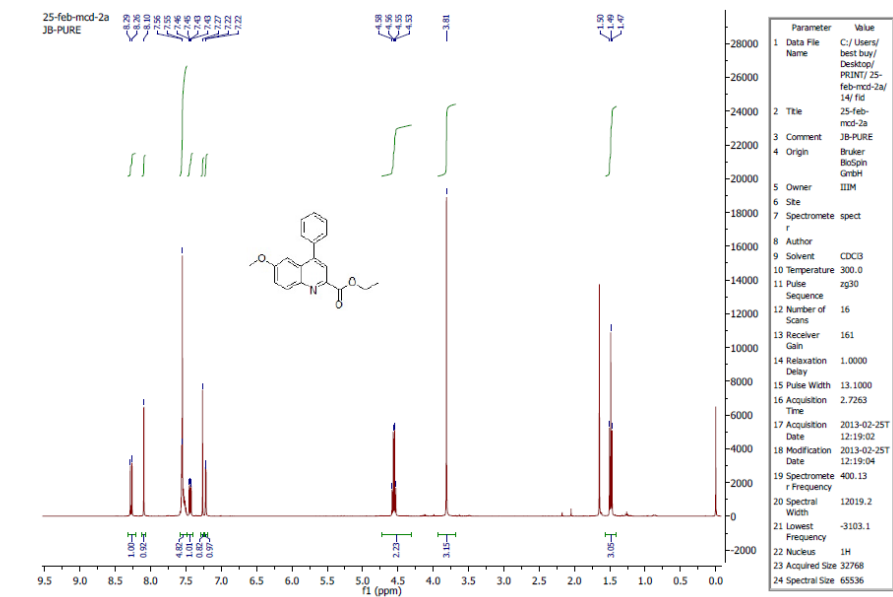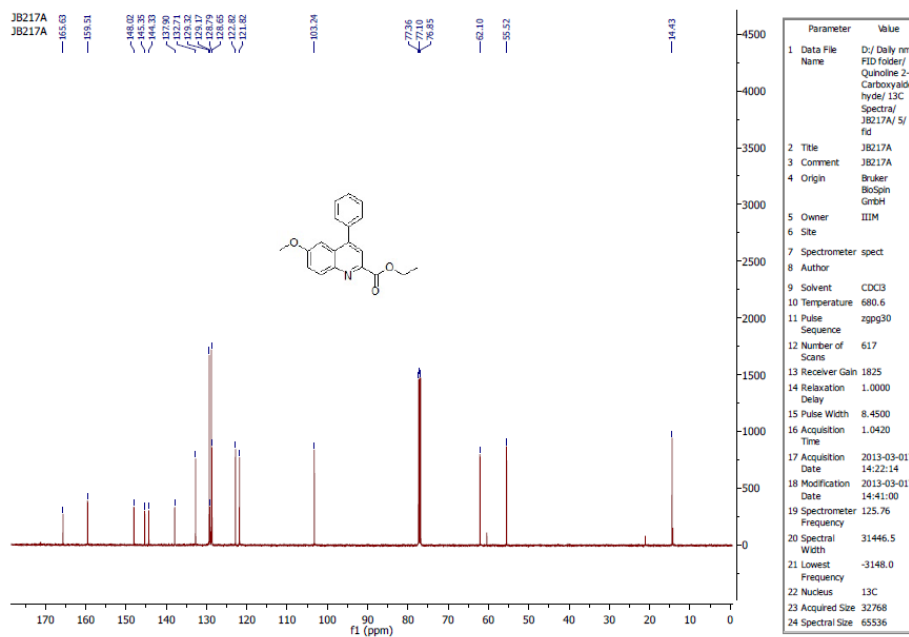

JB217A  
JB217A

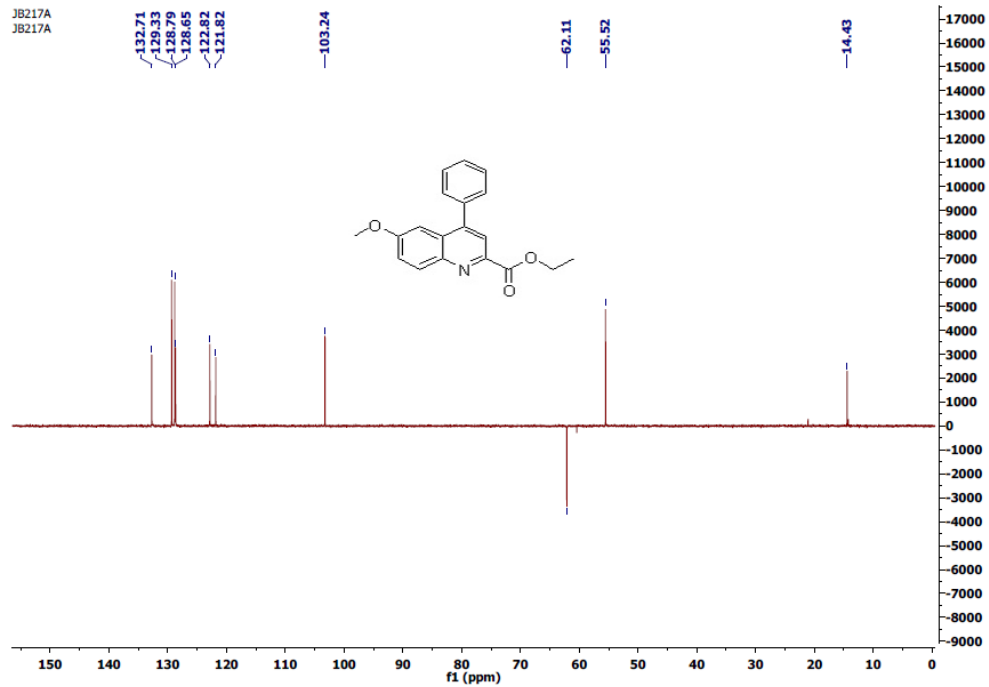

**S1.b.**  $^1\text{H}$ ,  $^{13}\text{C}$  and DEPT-135 NMR spectrum of ethyl 6-methoxy-4-p-tolylquinoline-2-carboxylate (**1b**)

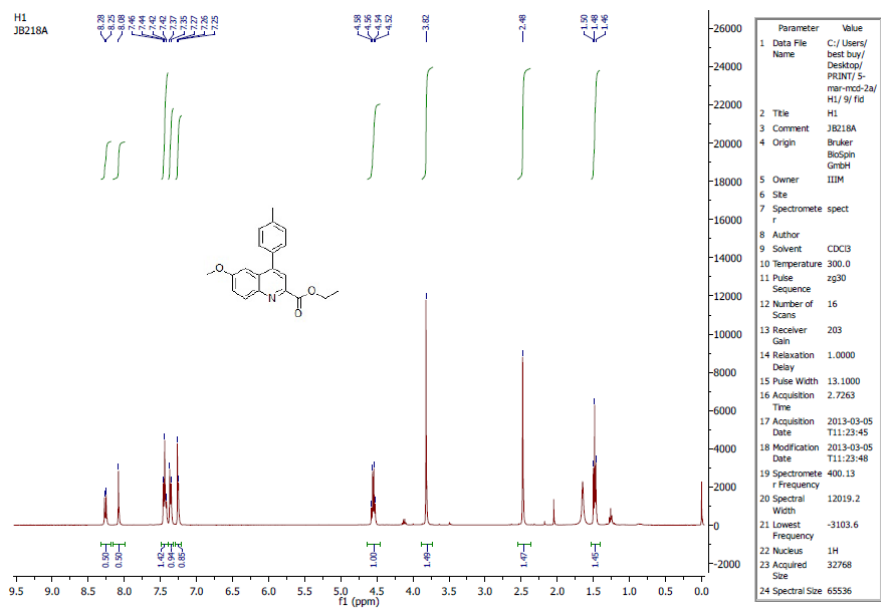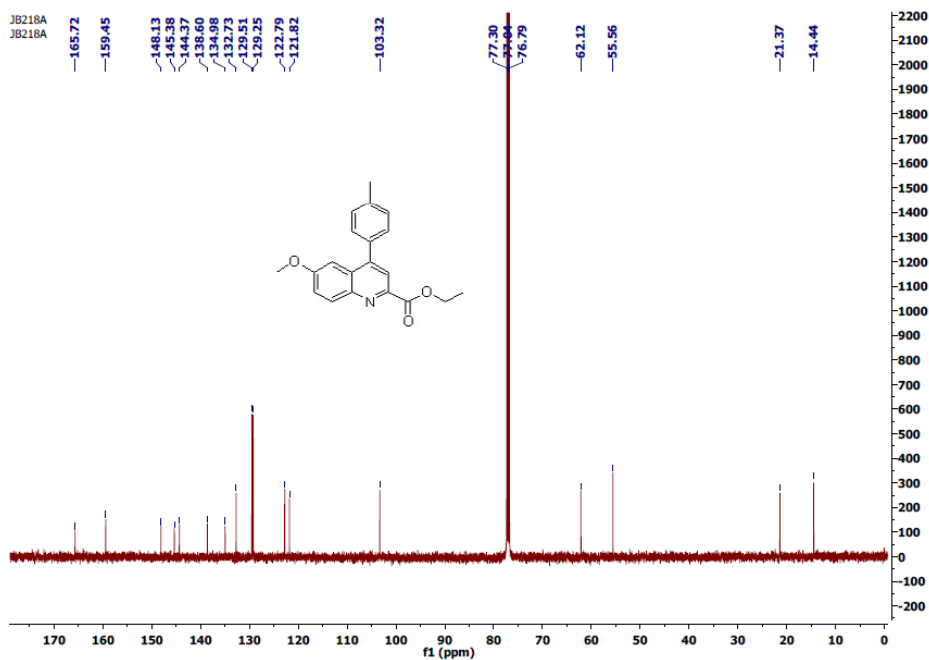

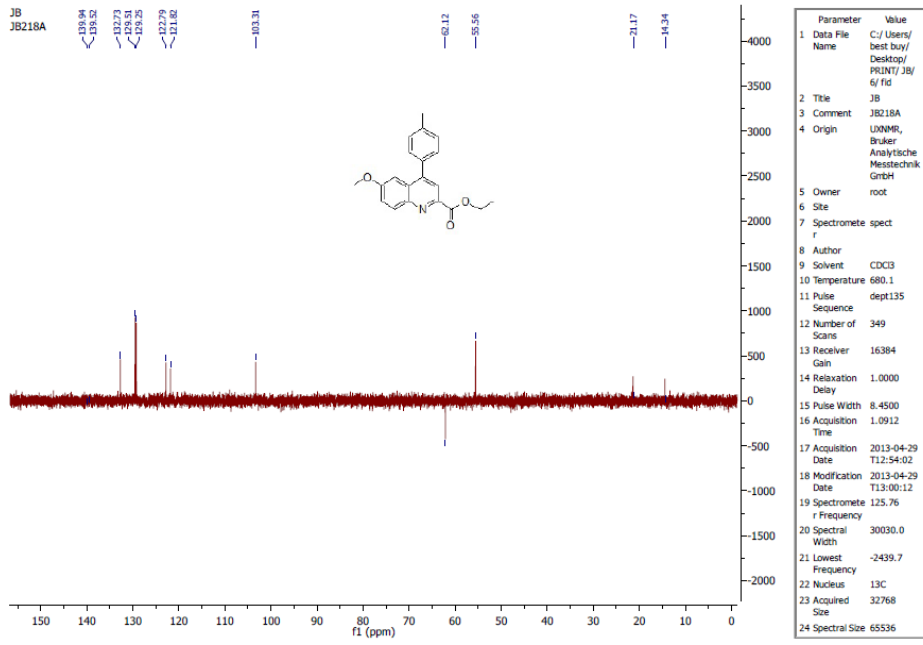

**S1.c.**  $^1\text{H}$ ,  $^{13}\text{C}$  and DEPT-135 NMR spectrum of ethyl 6-methoxy-4-(thiophen-3-yl)quinoline-2-carboxylate (**1c**)

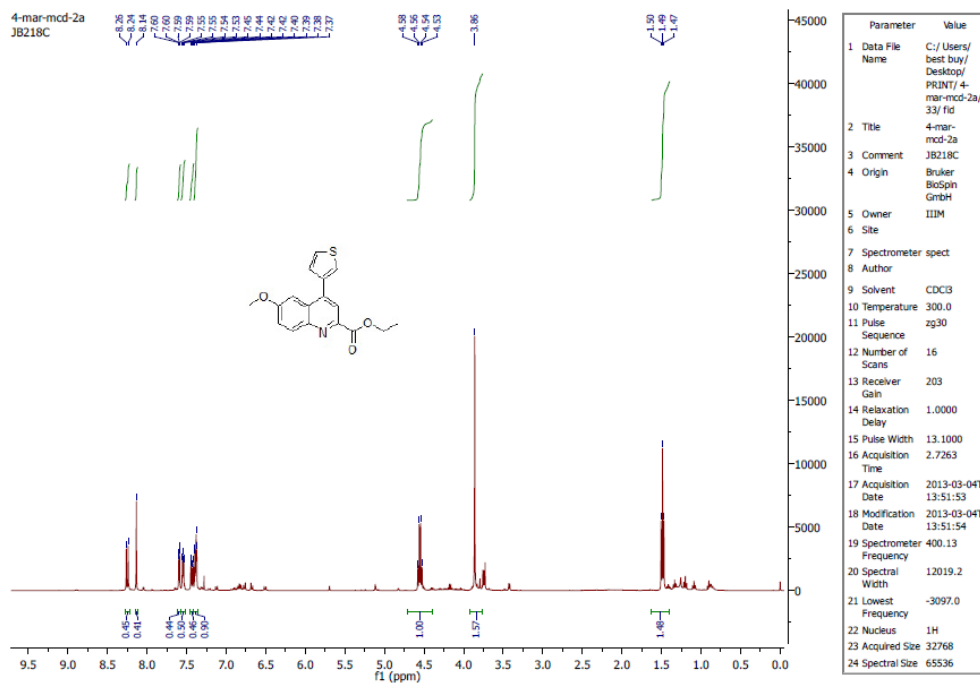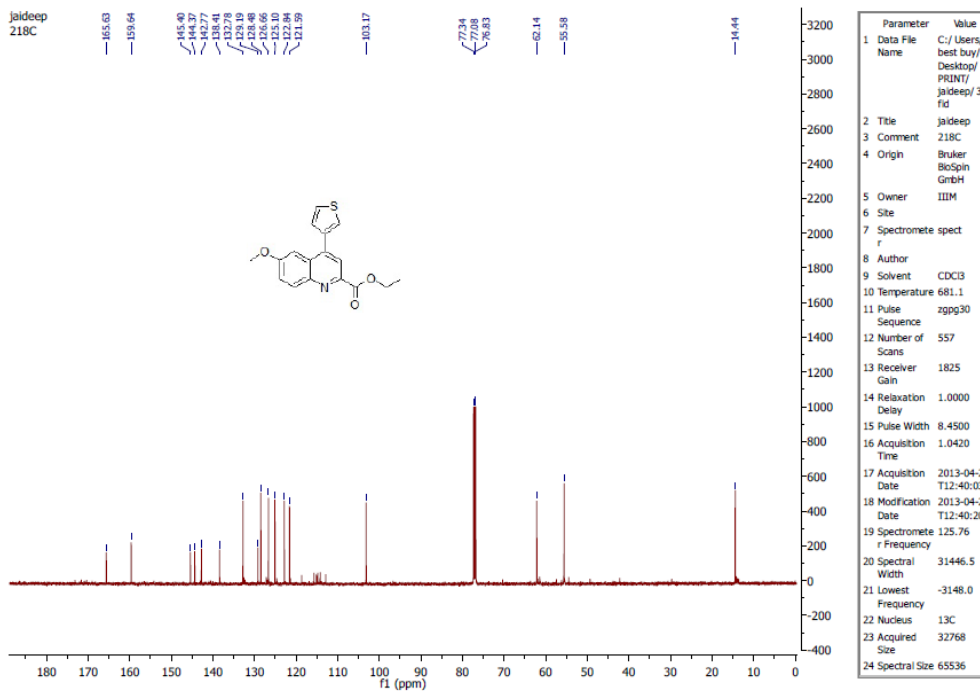



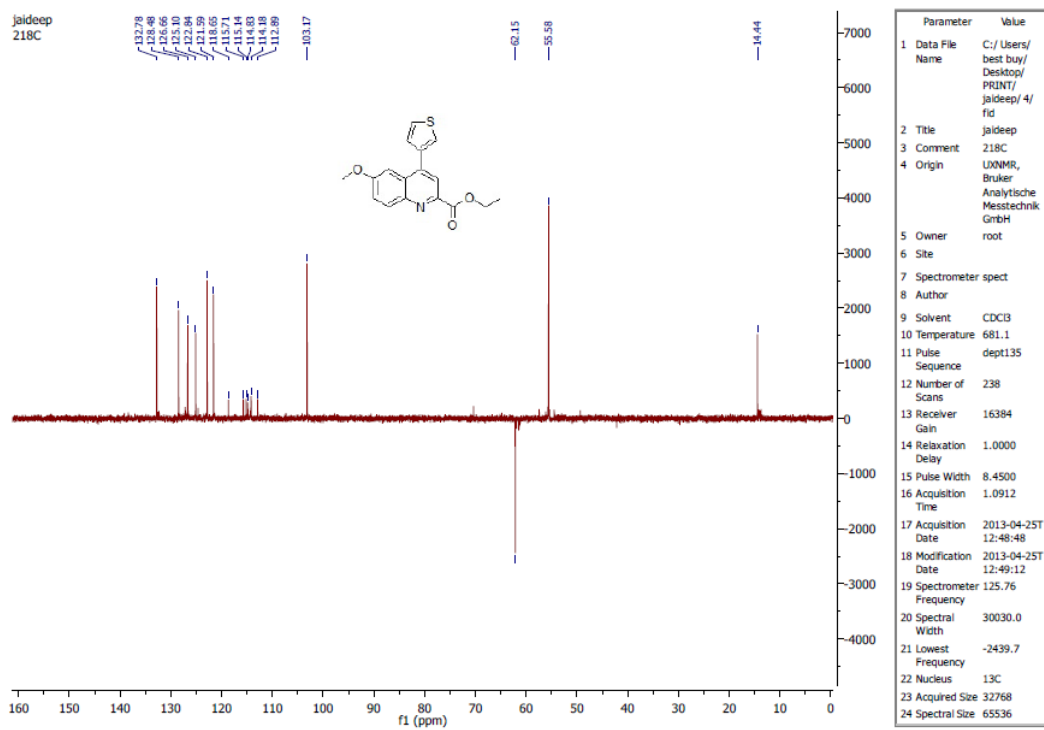

**S1.d.**  $^1\text{H}$ ,  $^{13}\text{C}$ , DEPT-135 and  $^{19}\text{F}$  NMR spectrum of ethyl 4-(4-(trifluoromethyl)phenyl)-6-methoxyquinoline-2-carboxylate (**1d**)

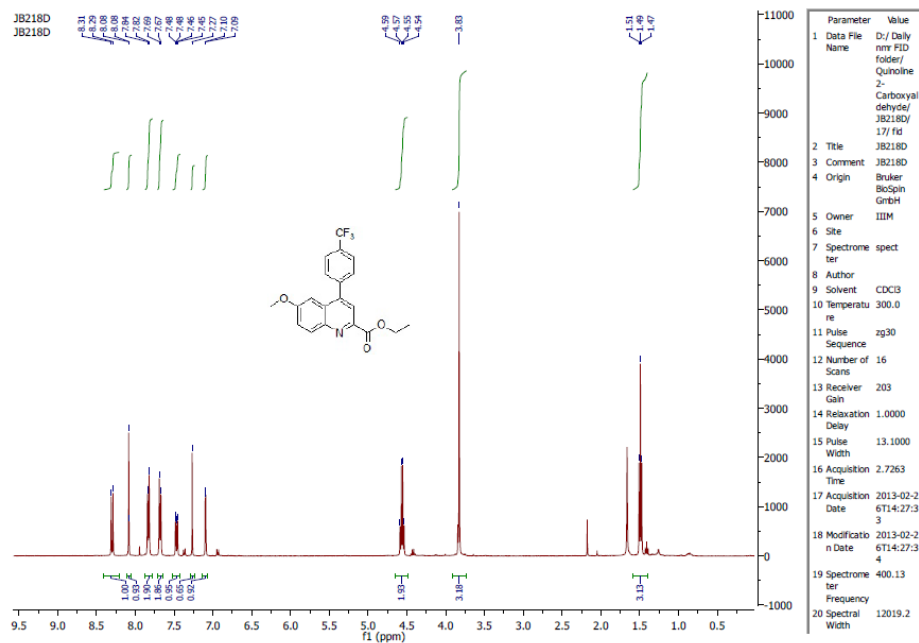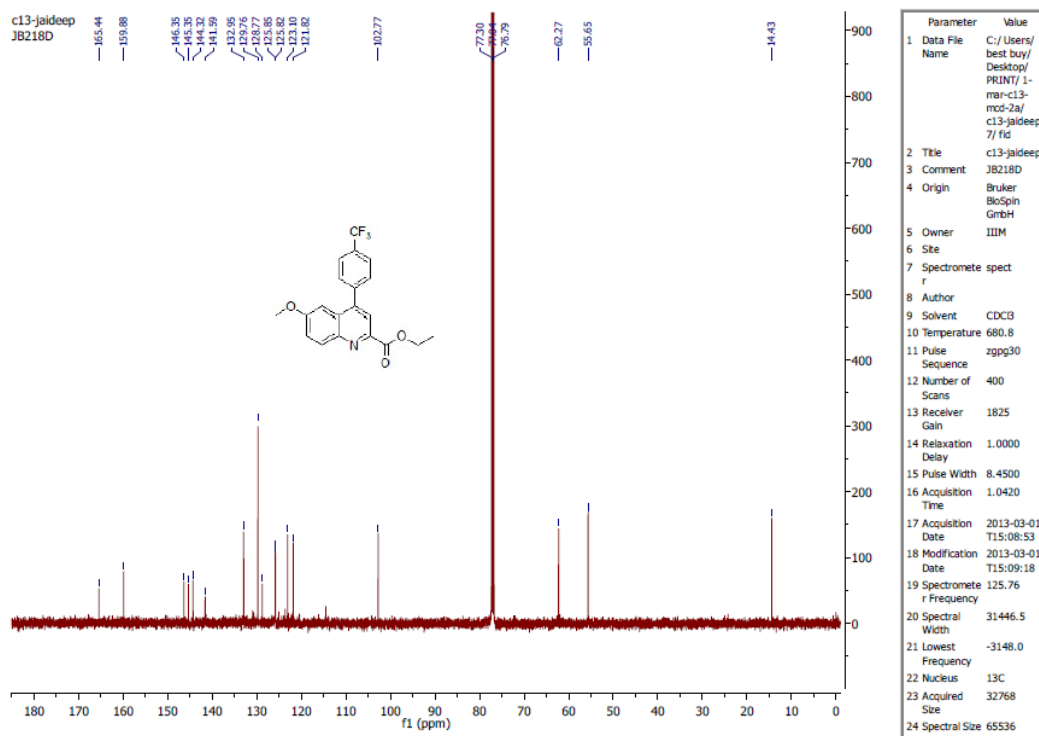

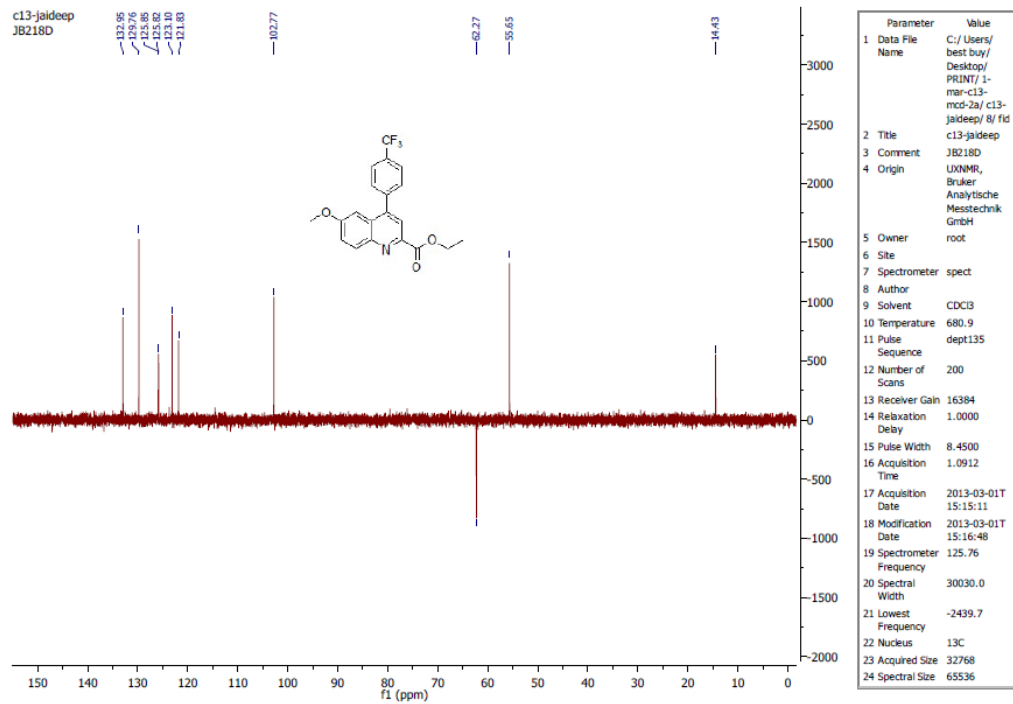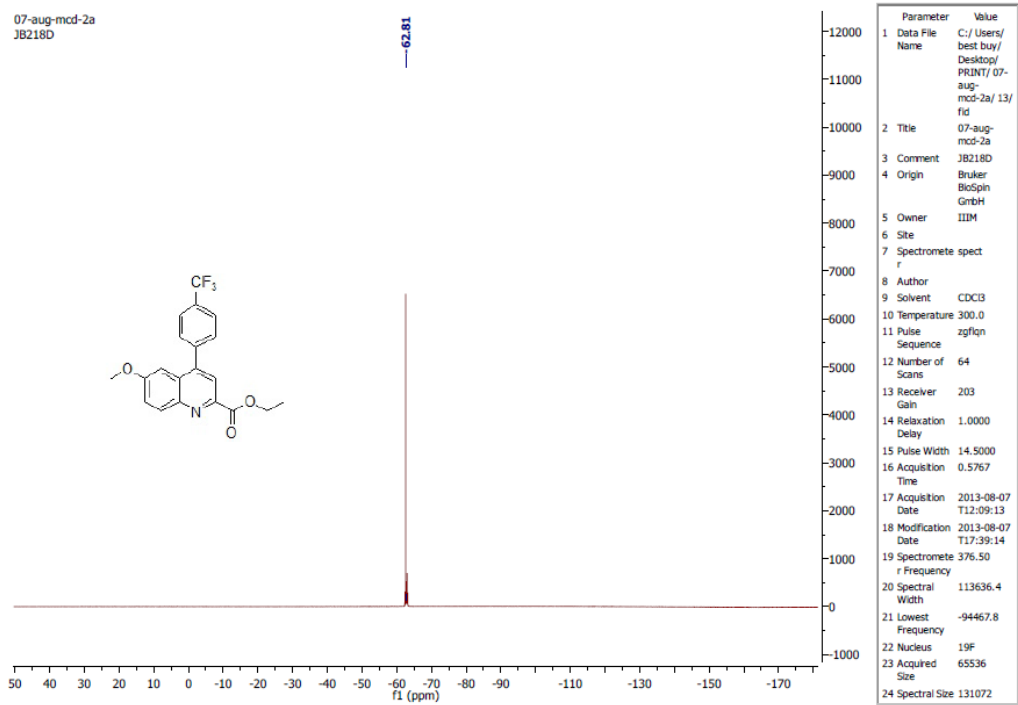

**S1.e.**  $^1\text{H}$ ,  $^{13}\text{C}$  and DEPT-135 NMR spectrum of ethyl 4-(4-tert-butylphenyl)-6-methoxyquinoline-2-carboxylate (**1e**)

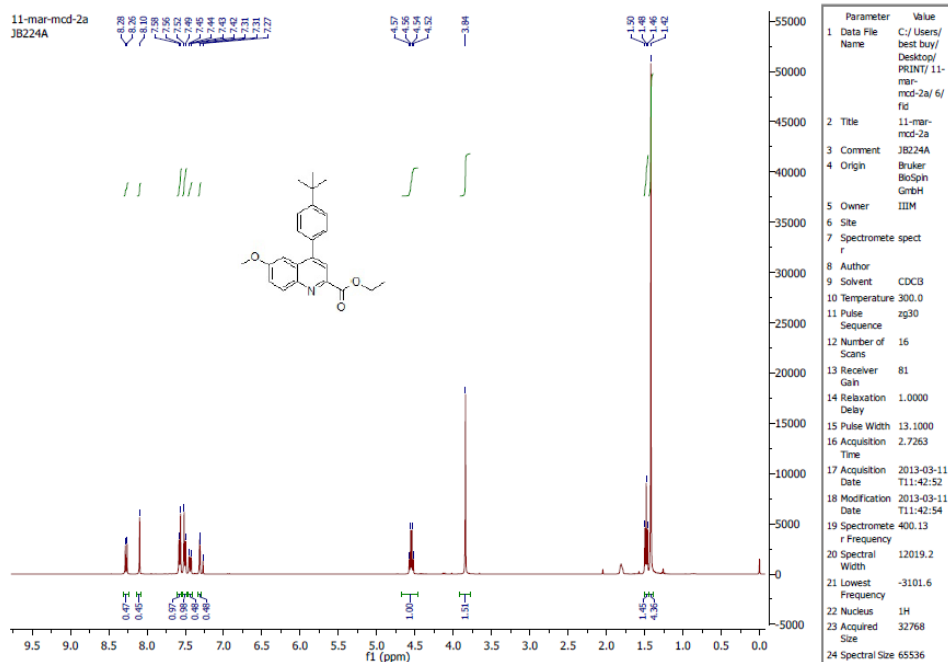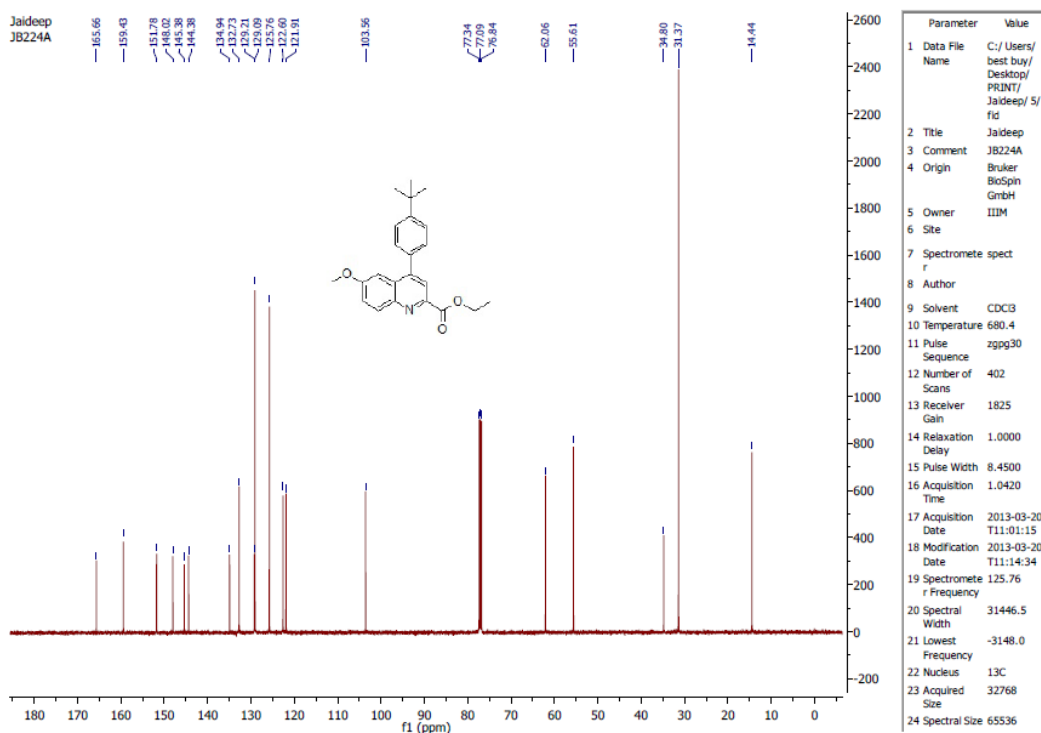

Jaideep  
JB224A

132.23  
128.09  
125.76  
122.60  
121.51

103.55

62.07

55.61

31.37

14.44

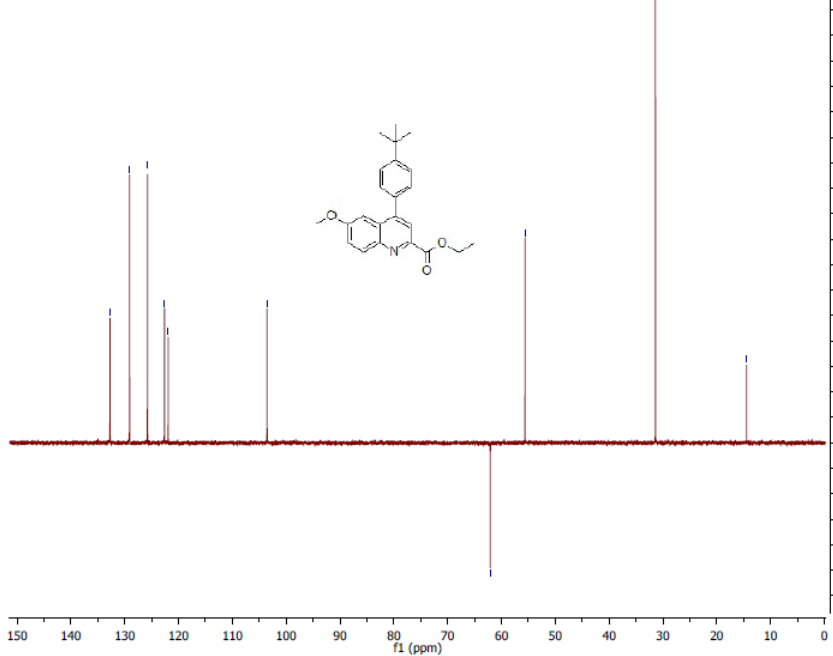

| Parameter                 | Value                                         |
|---------------------------|-----------------------------------------------|
| 1 Data File Name          | C:/Users/best buy/Desktop/PRINT/Jaideep/6/fid |
| 2 Title                   | Jaideep                                       |
| 3 Comment                 | JB224A                                        |
| 4 Origin                  | LUXMR, Bruker Analytische Messtechnik GmbH    |
| 5 Owner                   | root                                          |
| 6 Site                    |                                               |
| 7 Spectrometer            | spect                                         |
| 8 Author                  |                                               |
| 9 Solvent                 | CDC13                                         |
| 10 Temperature            | 680.4                                         |
| 11 Pulse Sequence         | dept135                                       |
| 12 Number of Scans        | 200                                           |
| 13 Receiver Gain          | 16384                                         |
| 14 Relaxation Delay       | 1.0000                                        |
| 15 Pulse Width            | 8.4500                                        |
| 16 Acquisition Time       | 1.0912                                        |
| 17 Acquisition Date       | 2013-03-20T 11:15:11                          |
| 18 Modification Date      | 2013-03-20T 11:22:30                          |
| 19 Spectrometer Frequency | 125.76                                        |
| 20 Spectral Width         | 30030.0                                       |
| 21 Lowest Frequency       | -2439.7                                       |
| 22 Nucleus                | 13C                                           |
| 23 Acquired Size          | 32768                                         |
| 24 Spectral Size          | 65536                                         |

**S1.f.**  $^1\text{H}$ ,  $^{13}\text{C}$  and DEPT-135 NMR spectrum of ethyl 4-(4-bromophenyl)-6-methoxyquinoline-2-carboxylate (**1f**)

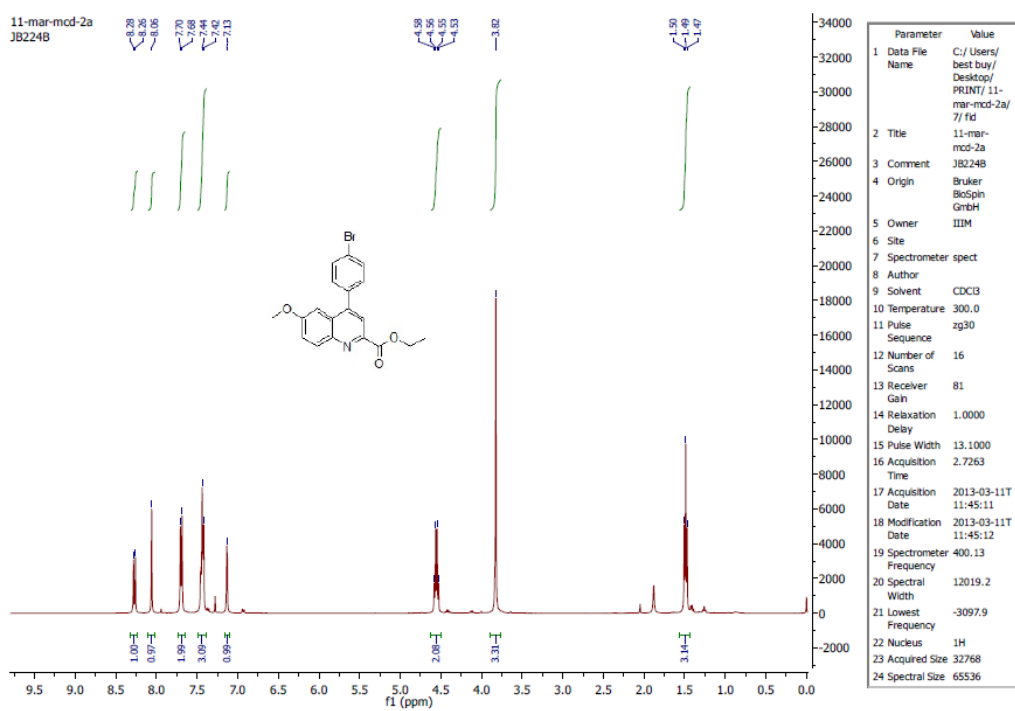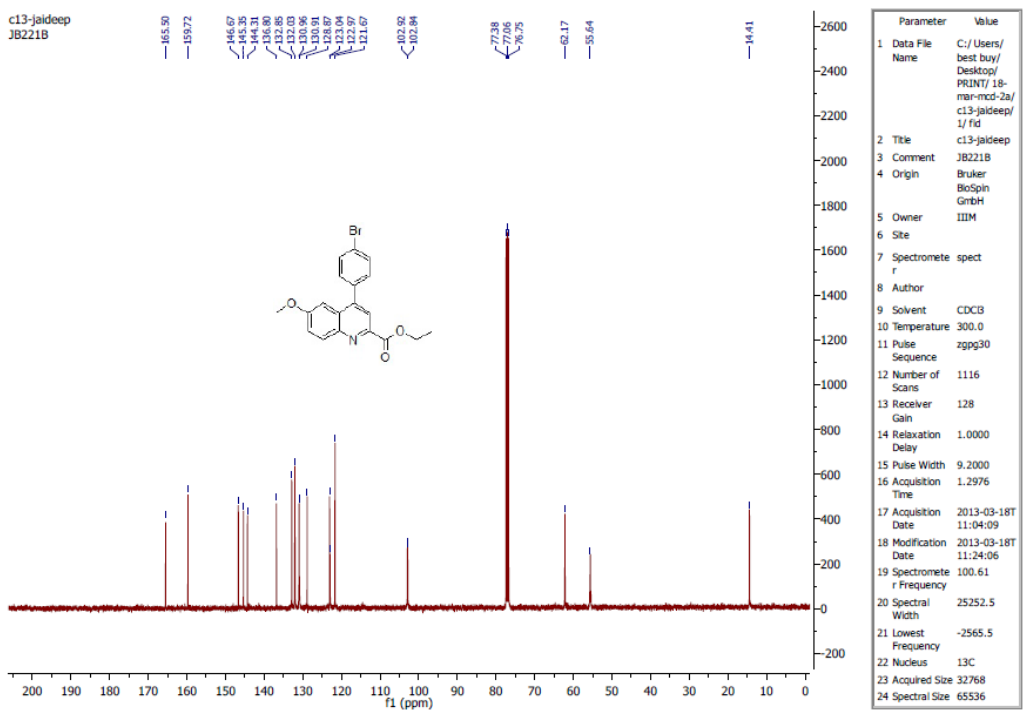

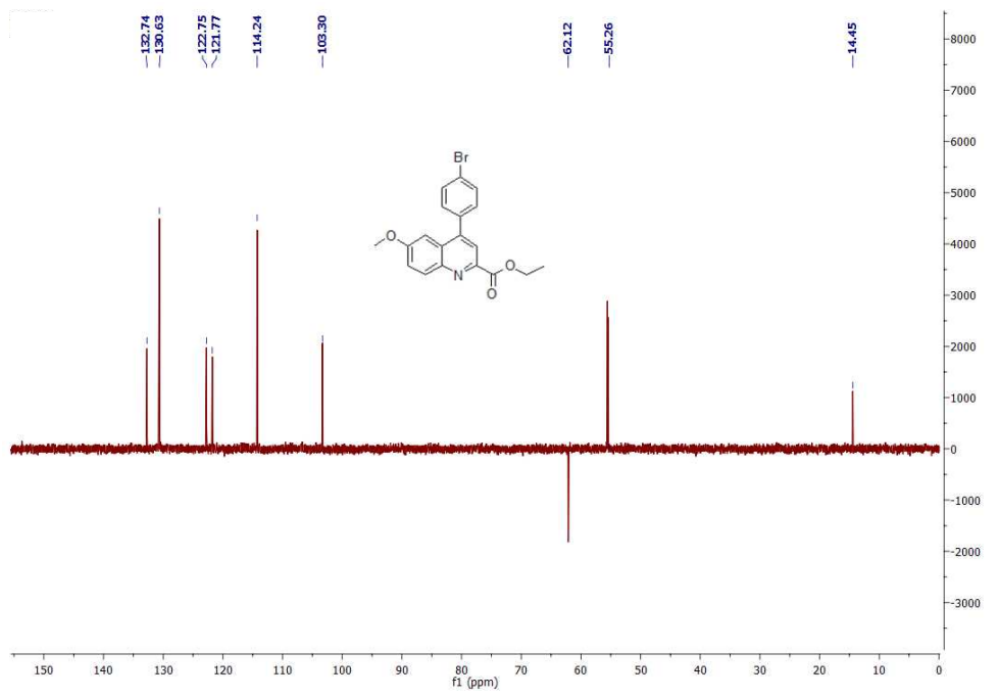

**S1.g.**  $^1\text{H}$ ,  $^{13}\text{C}$  and DEPT-135 NMR spectrum of ethyl 6-methoxy-4-(4-methoxyphenyl)quinoline-2-carboxylate (**1g**)

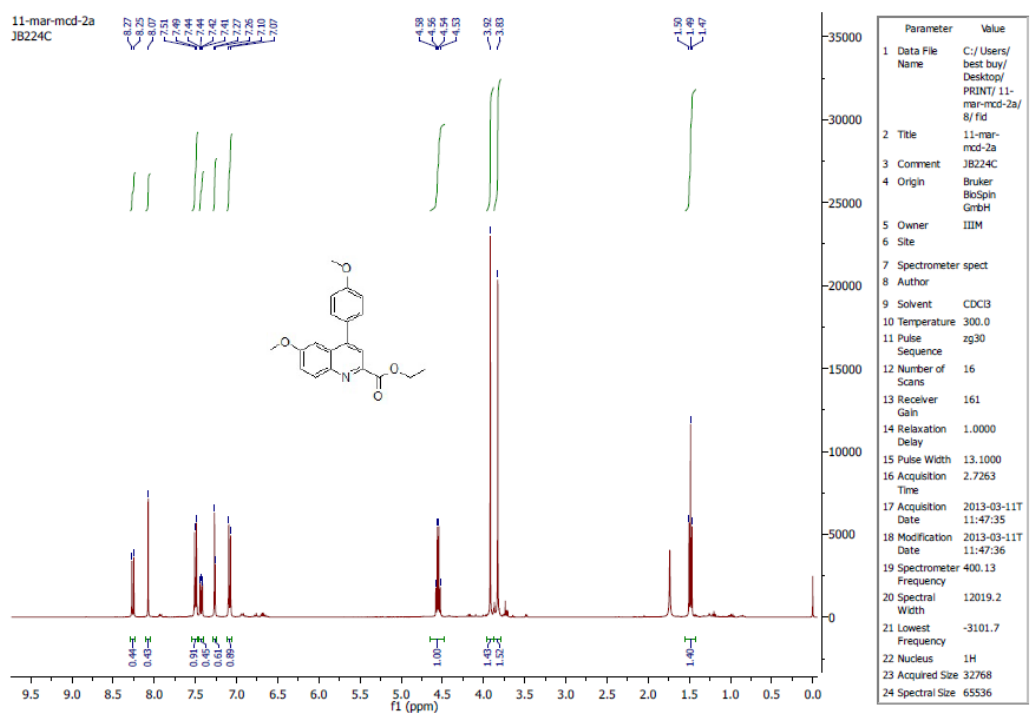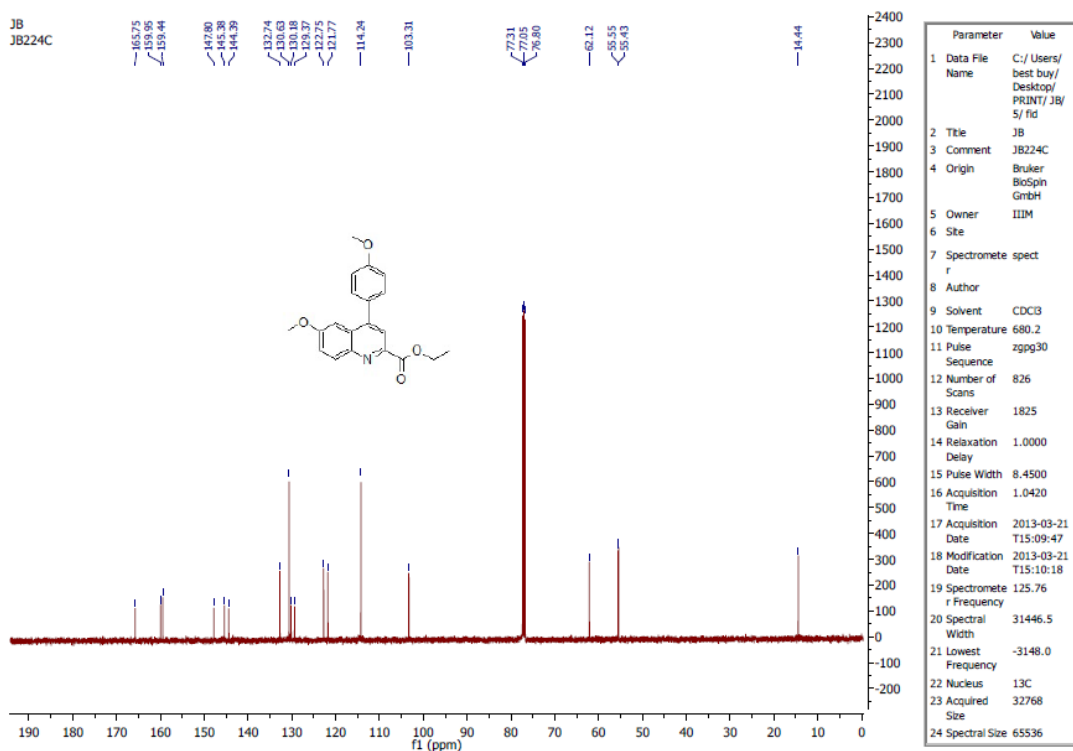



JB  
JB224C

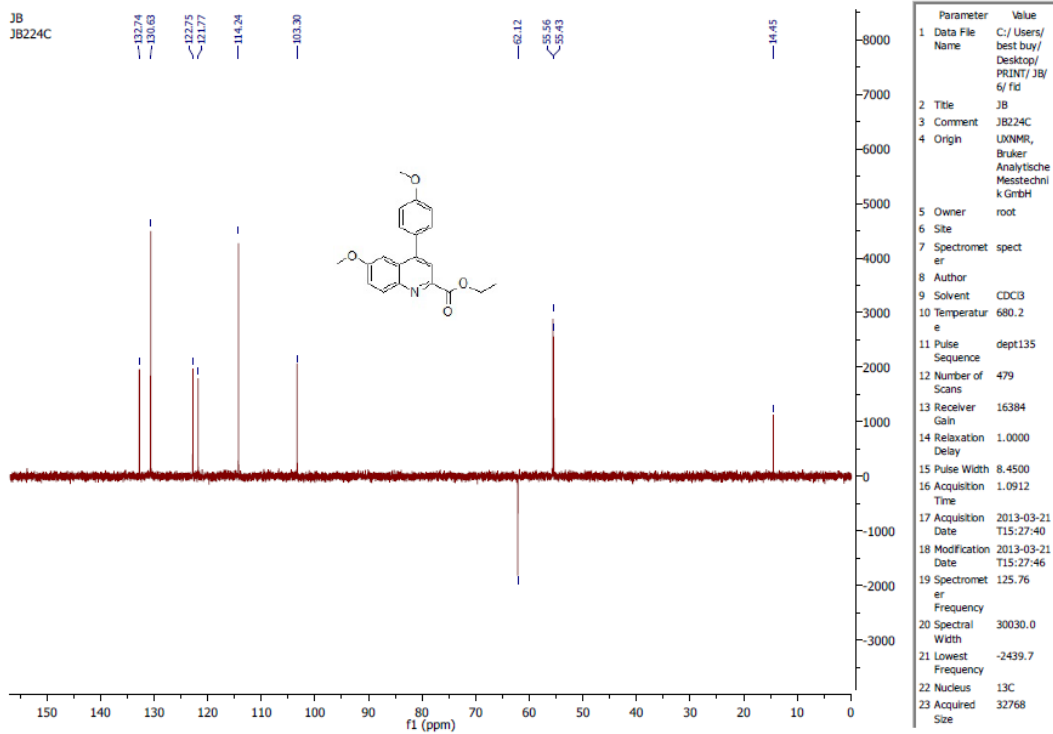

| Parameter                 | Value                                       |
|---------------------------|---------------------------------------------|
| 1 Data File Name          | C:/Users/best buy/Desktop/PRINT/ JB/ 6/ fid |
| 2 Title                   | JB                                          |
| 3 Comment                 | JB224C                                      |
| 4 Origin                  | Brüker Analytische Messtechnik GmbH         |
| 5 Owner                   | root                                        |
| 6 Site                    |                                             |
| 7 Spectrometer            | spect                                       |
| 8 Author                  |                                             |
| 9 Solvent                 | CDC3                                        |
| 10 Temperature            | 680.2                                       |
| 11 Pulse Sequence         | dept135                                     |
| 12 Number of Scans        | 479                                         |
| 13 Receiver Gain          | 16384                                       |
| 14 Relaxation Delay       | 1.0000                                      |
| 15 Pulse Width            | 8.4500                                      |
| 16 Acquisition Time       | 1.0912                                      |
| 17 Acquisition Date       | 2013-03-21 15:27:40                         |
| 18 Modification Date      | 2013-03-21 15:27:46                         |
| 19 Spectrometer Frequency | 125.76                                      |
| 20 Spectral Width         | 30030.0                                     |
| 21 Lowest Frequency       | -2439.7                                     |
| 22 Nucleus                | 13C                                         |
| 23 Acquired Size          | 32768                                       |

**S1.h.** <sup>1</sup>H, <sup>13</sup>C and DEPT-135 NMR spectrum of ethyl 6-methoxy-4-m-tolylquinoline-2-carboxylate (**1h**)

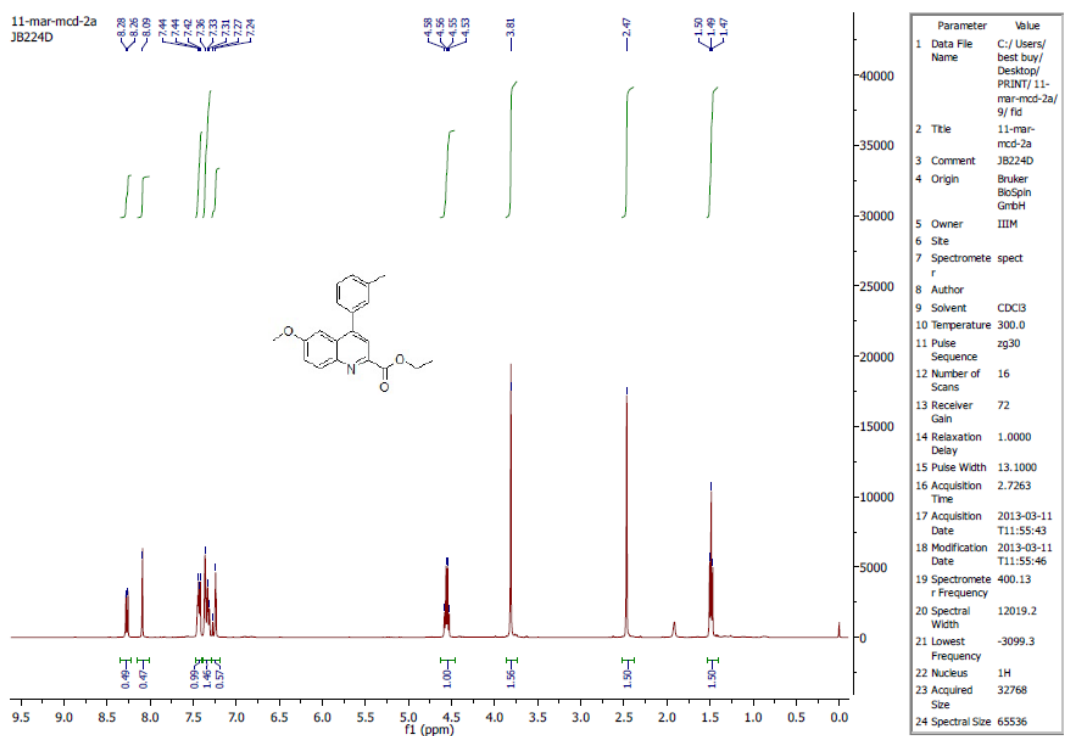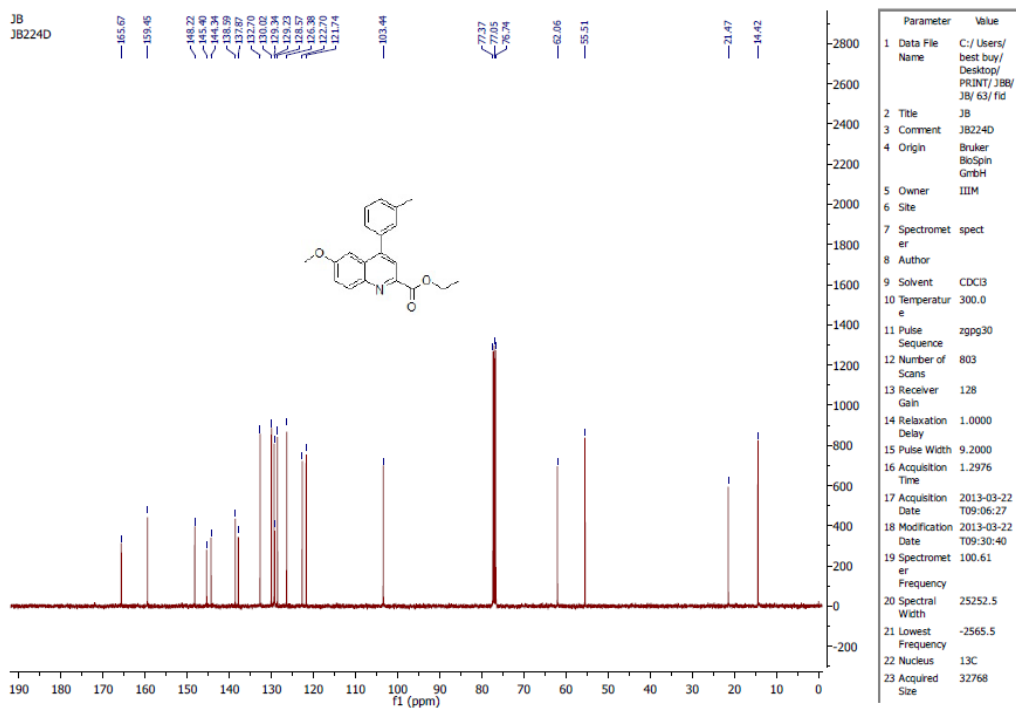

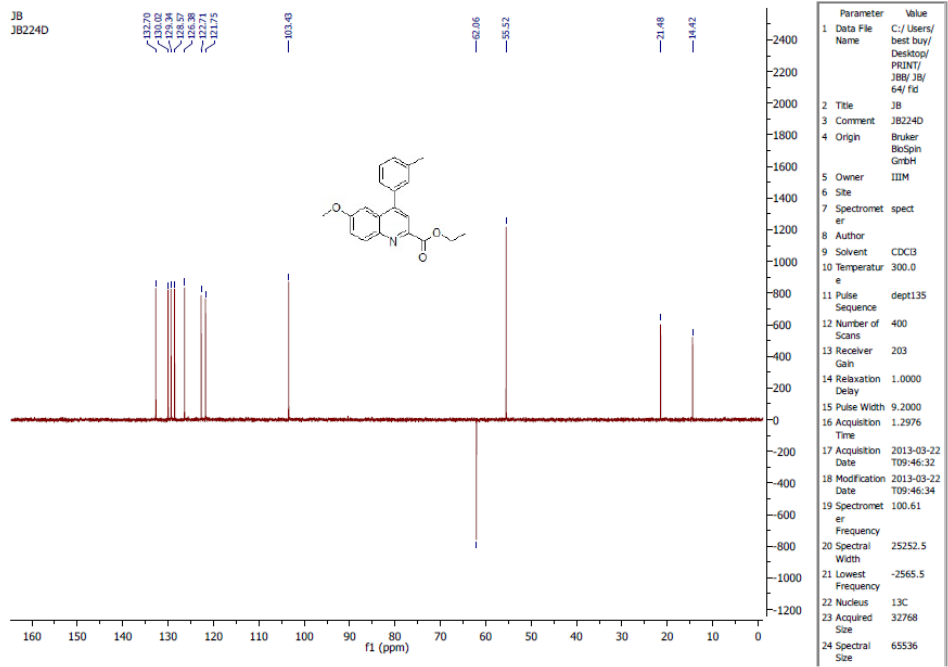

**S2.i.**  $^1\text{H}$ ,  $^{13}\text{C}$  and DEPT-135 NMR spectrum of ethyl 8-phenyl-[1,3]dioxolo[4,5-g]quinoline-6-carboxylate (**1i**)

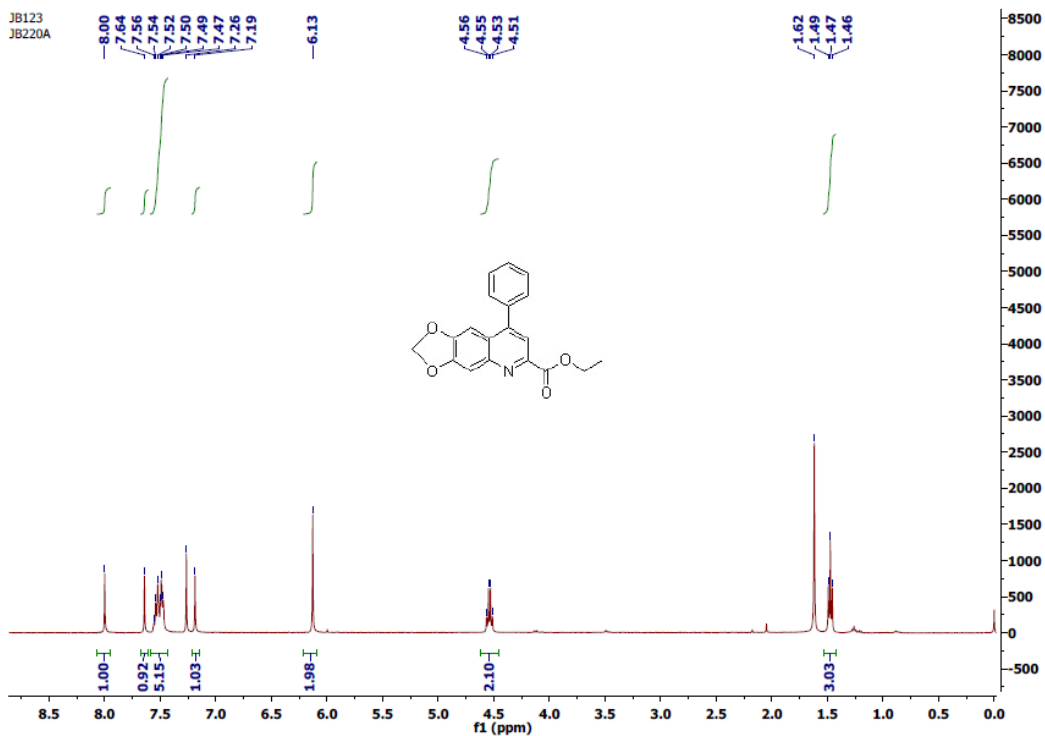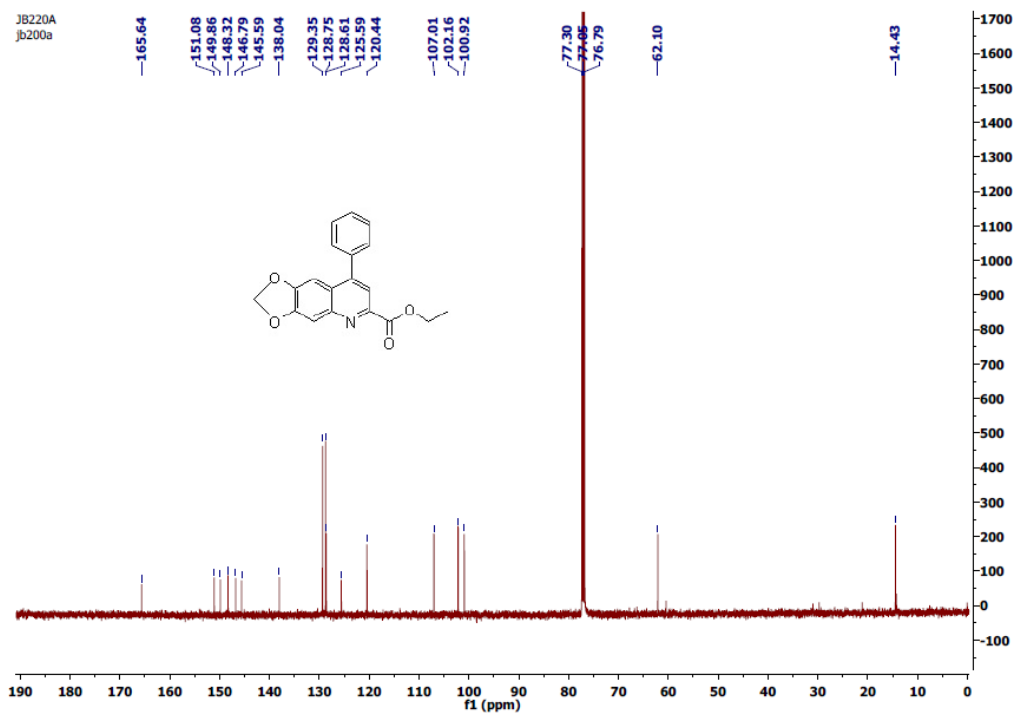

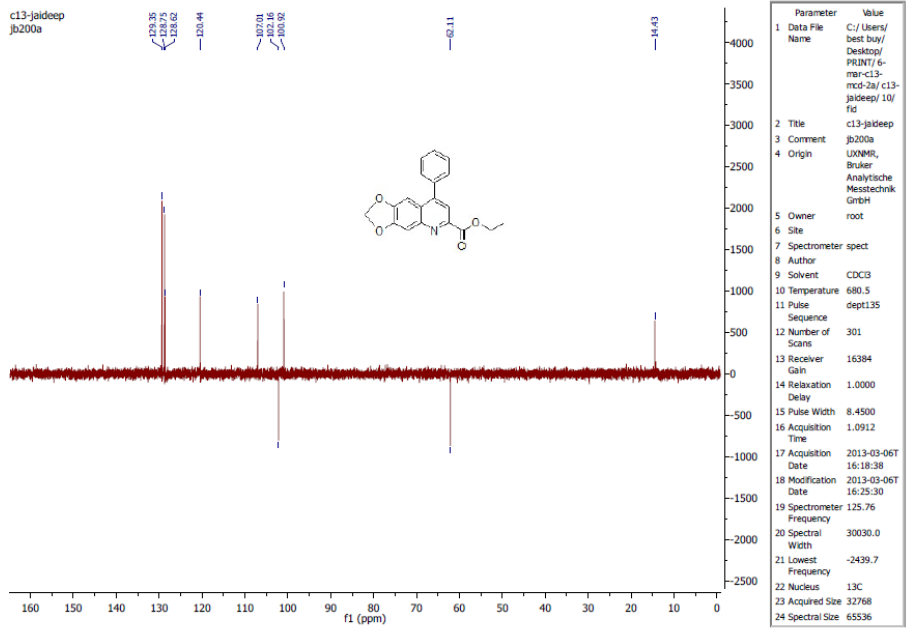

**S2.j.**  $^1\text{H}$ ,  $^{13}\text{C}$  and DEPT-135 NMR spectrum of ethyl 8-p-tolyl-[1,3]dioxolo[4,5-g]quinoline-6-carboxylate (**1j**)

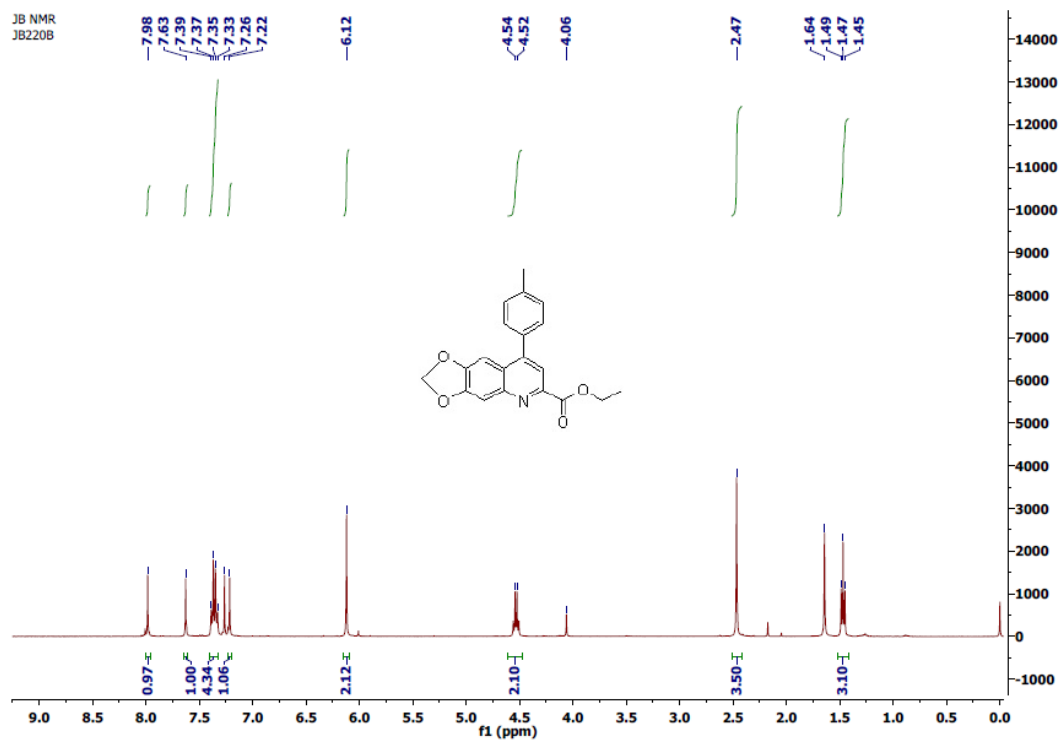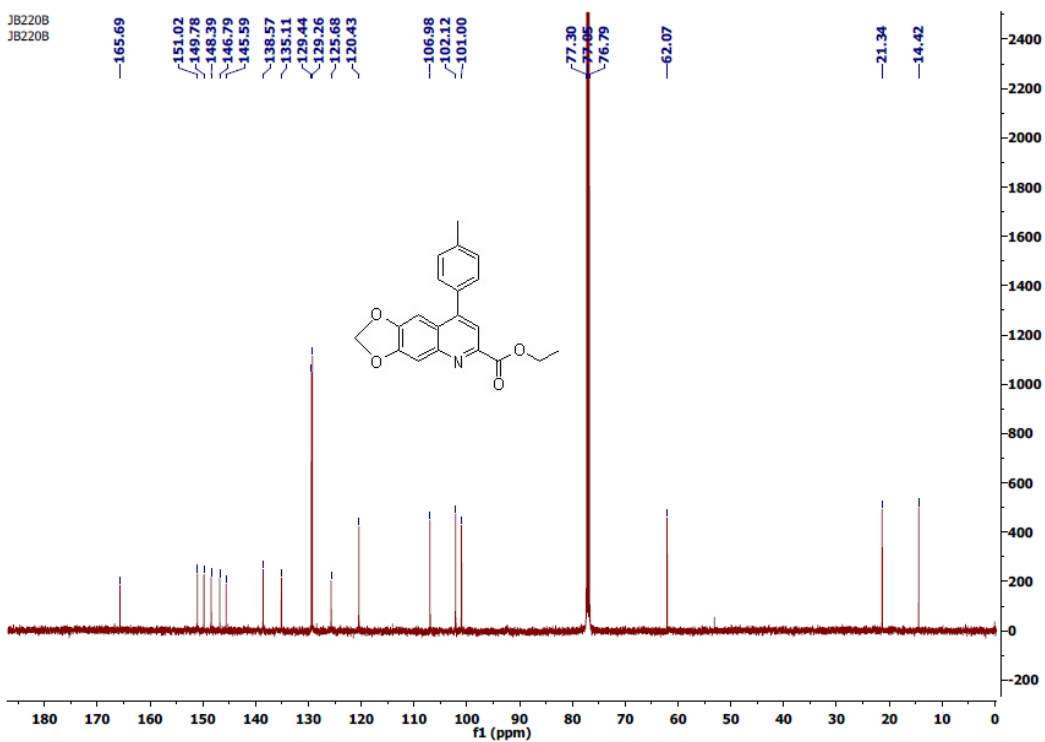

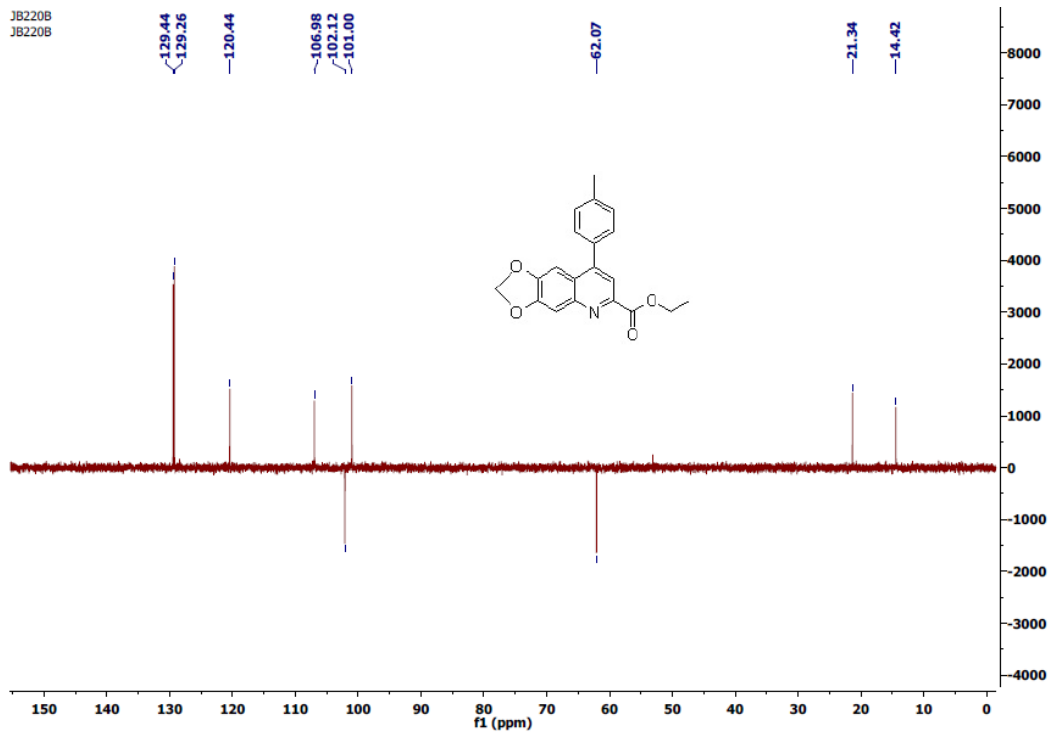

**S2.k.**  $^1\text{H}$ ,  $^{13}\text{C}$ , DEPT-135 and  $^{19}\text{F}$  NMR spectrum of ethyl 8-(4-(trifluoromethyl)phenyl)-[1,3]dioxolo[4,5-g]quinoline-6-carboxylate (**1k**)

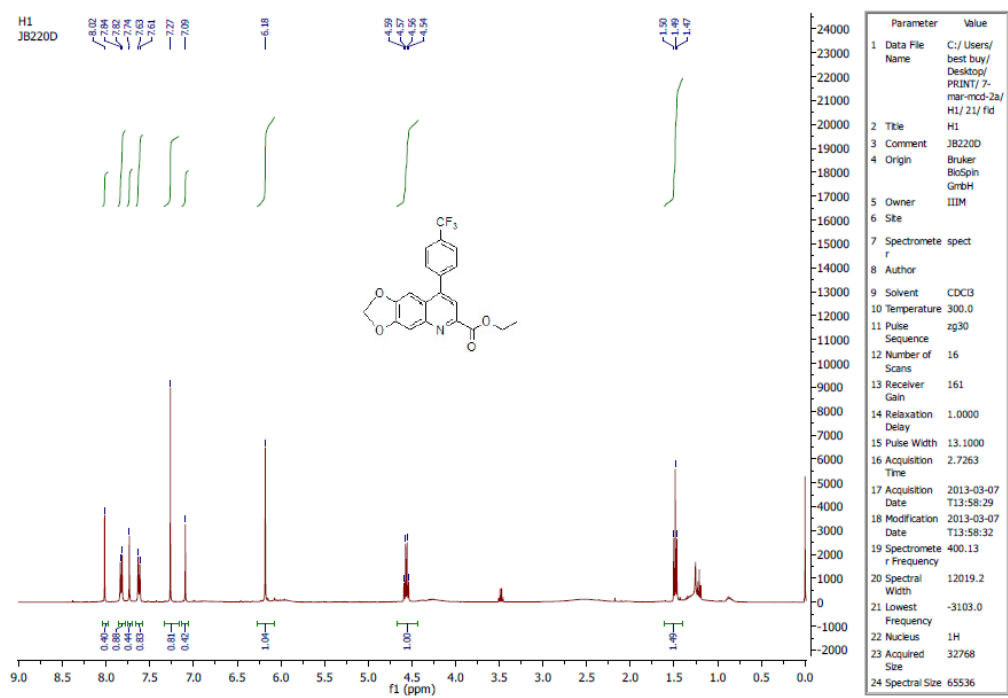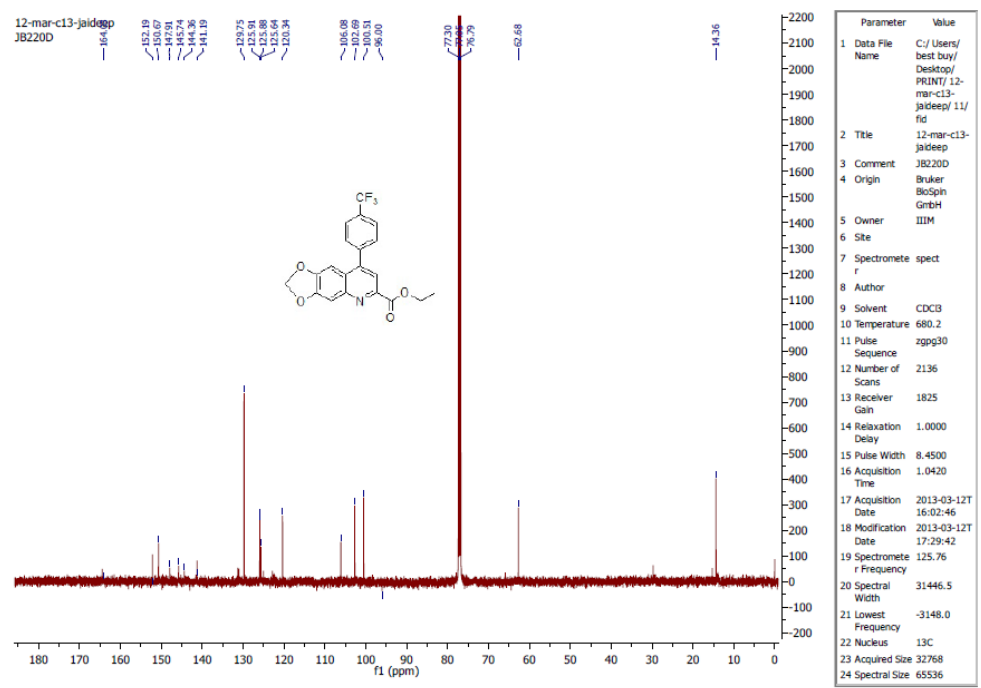



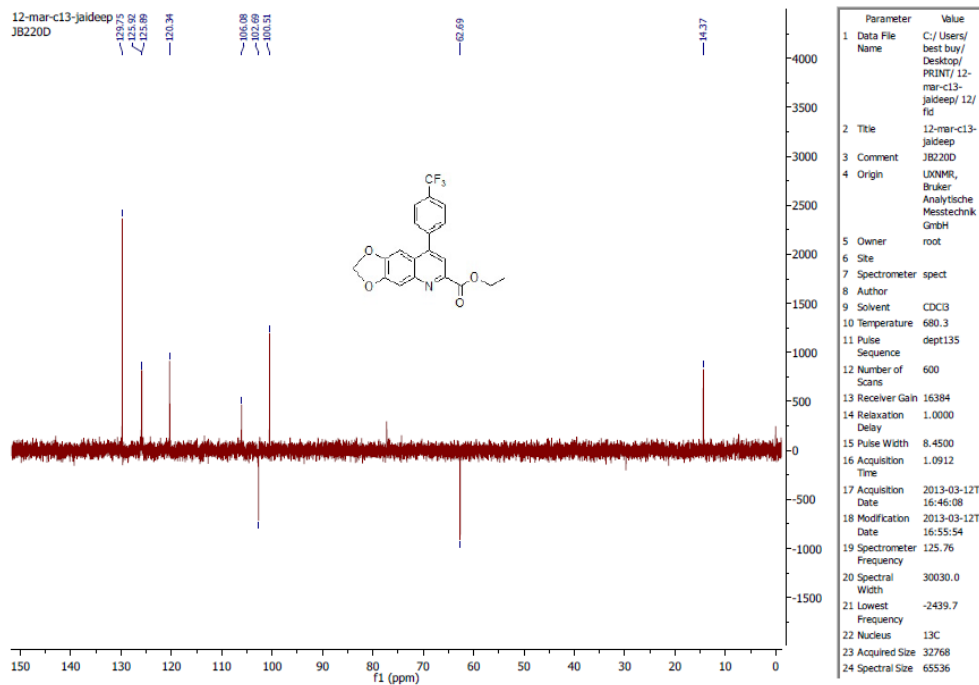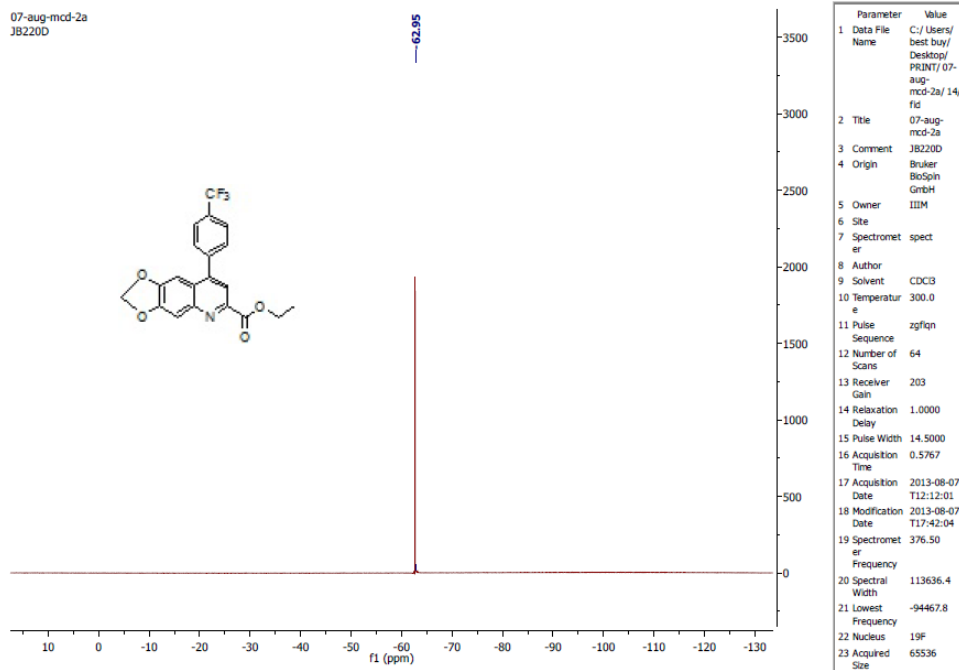

**S2.1.**  $^1\text{H}$ ,  $^{13}\text{C}$  and DEPT-135 NMR spectrum of ethyl 8-m-tolyl-[1,3]dioxolo[4,5-g]quinoline-6-carboxylate (**II**)

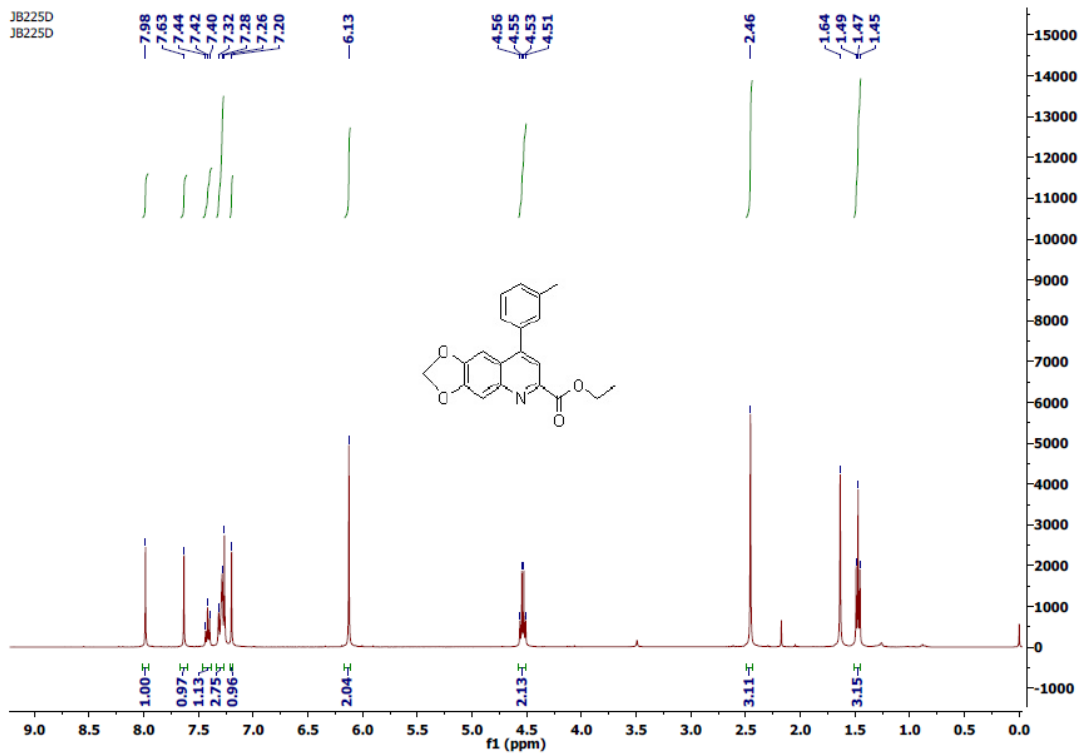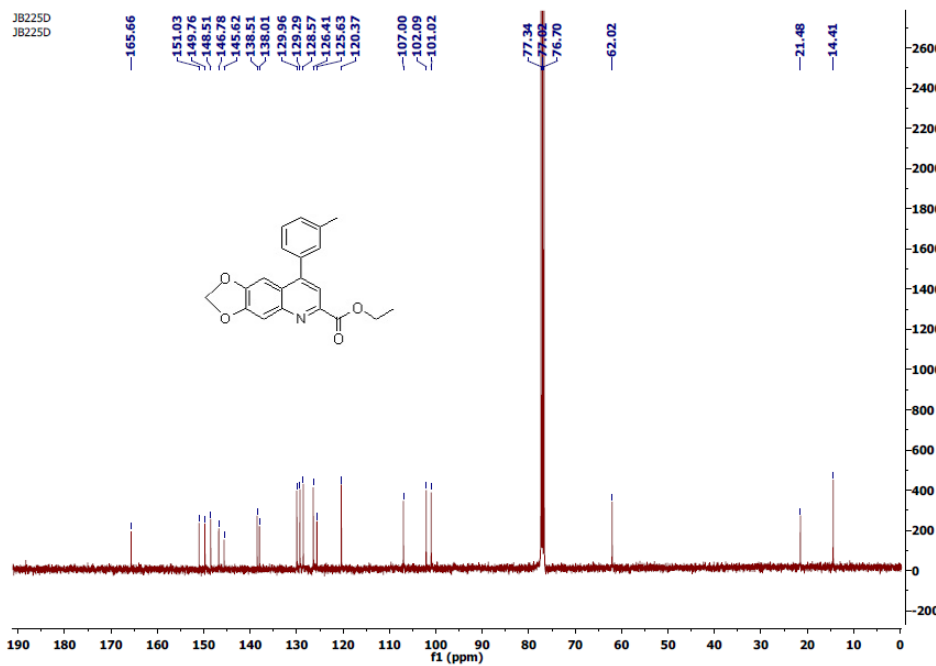

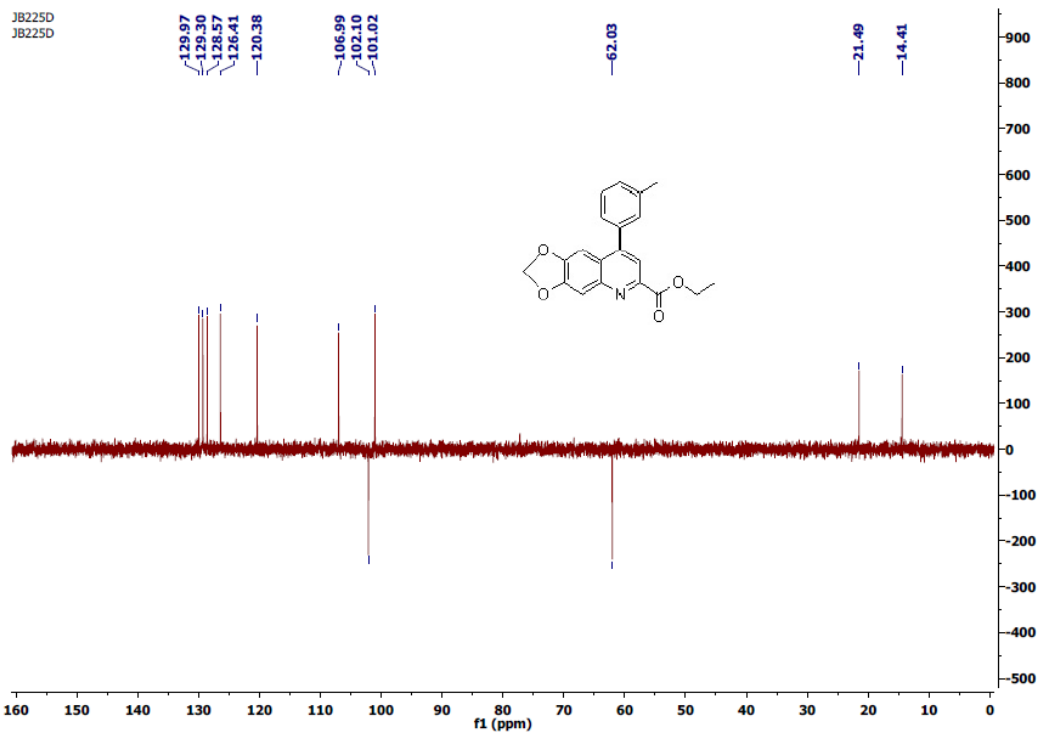

**S2.m.**  $^1\text{H}$ ,  $^{13}\text{C}$  and DEPT-135 NMR spectrum of ethyl 8-(3-chlorophenyl)-[1,3]dioxolo[4,5-g]quinoline-6-carboxylate (**1m**)

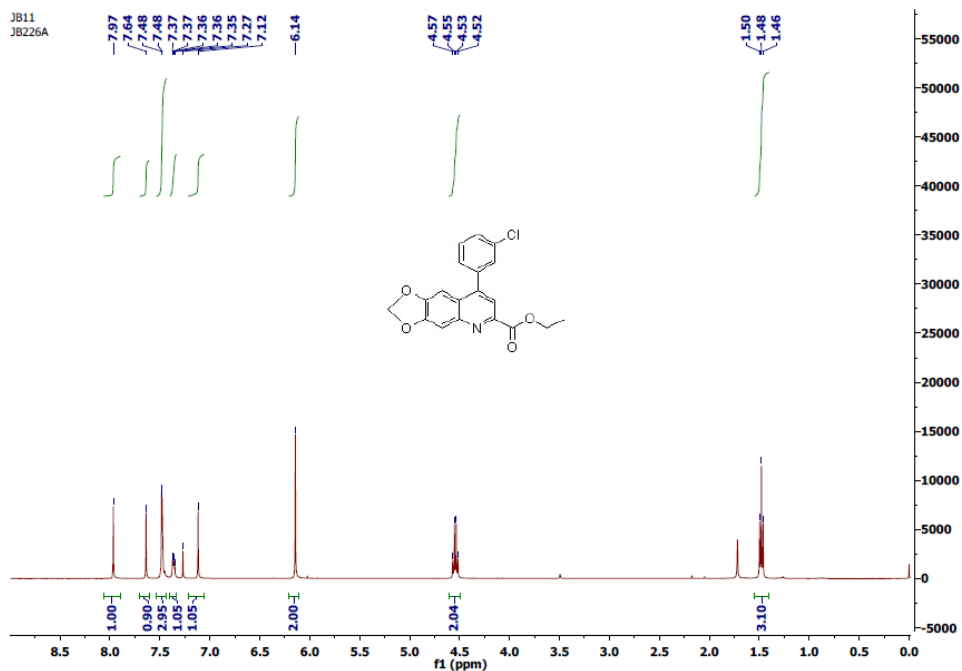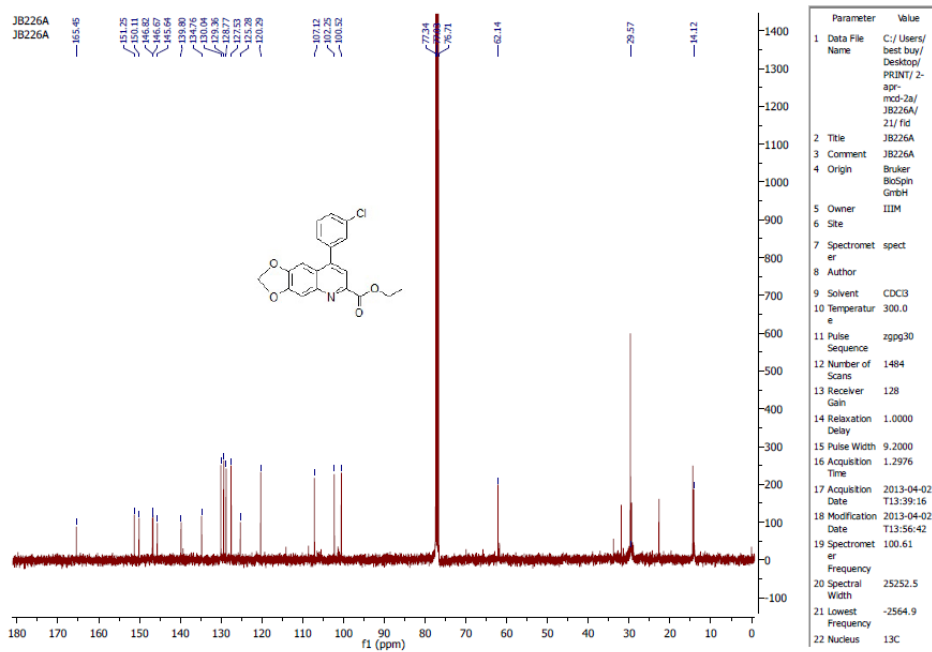

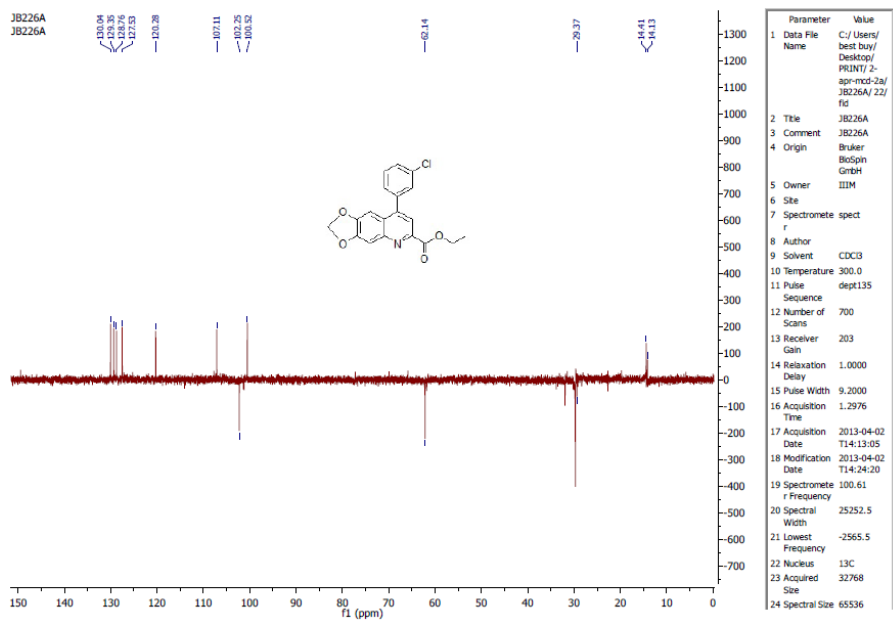

**S2.n.**  $^1\text{H}$ ,  $^{13}\text{C}$  and DEPT-135 NMR Spectrum of ethyl 8-(4-ethynylphenyl)-[1,3]dioxolo[4,5-g]quinoline-6-carboxylate (**1n**)

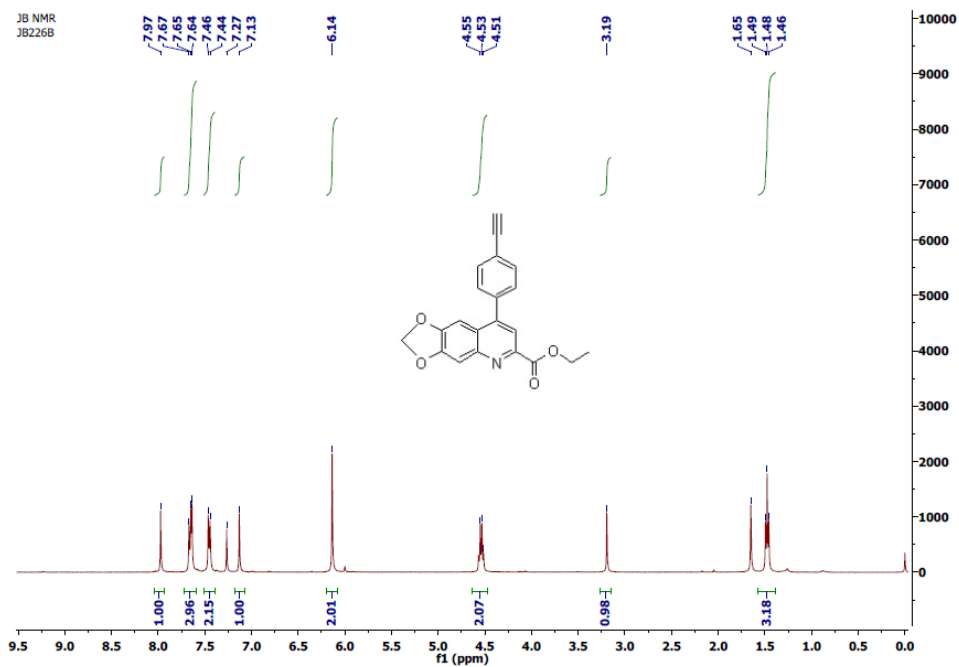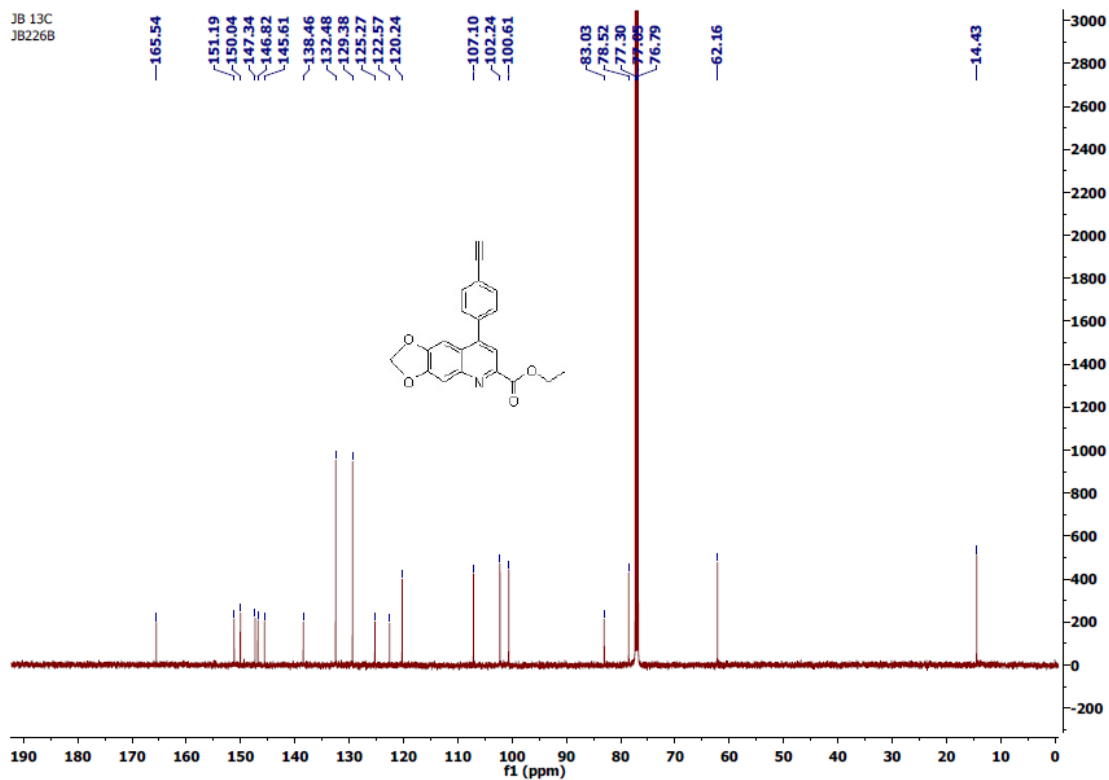

JB 13C  
JB226B

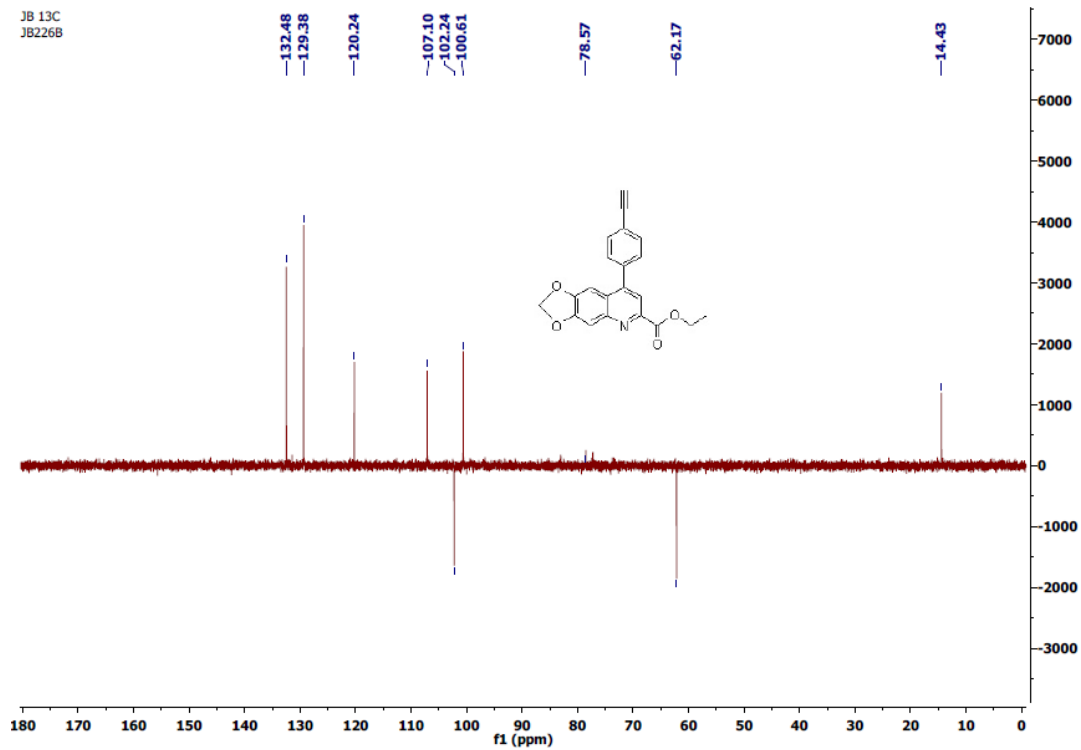

**S2.o.**  $^1\text{H}$ ,  $^{13}\text{C}$ , DEPT-135 and  $^{19}\text{F}$  NMR spectrum of ethyl 8-(4-(trifluoromethoxy)phenyl)-[1,3]dioxolo[4,5-g]quinoline-6-carboxylate (**1o**)

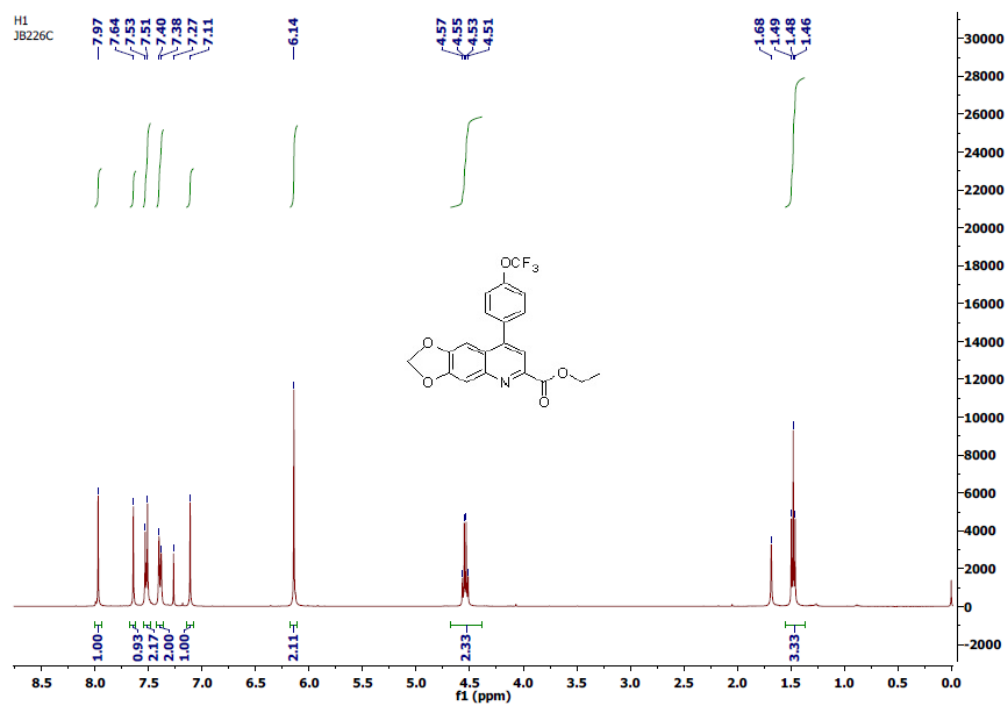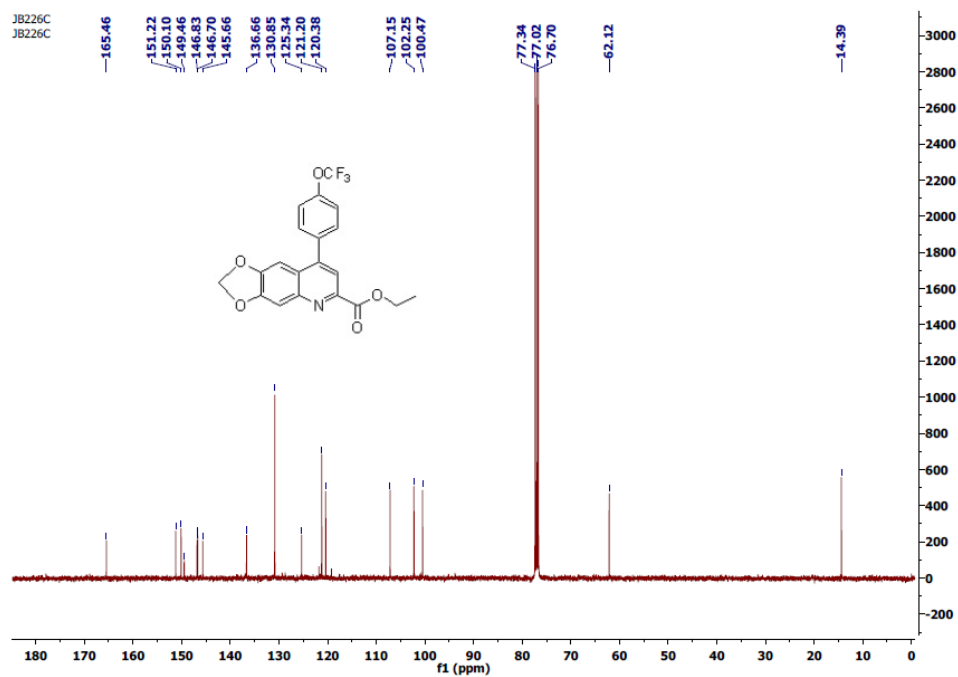



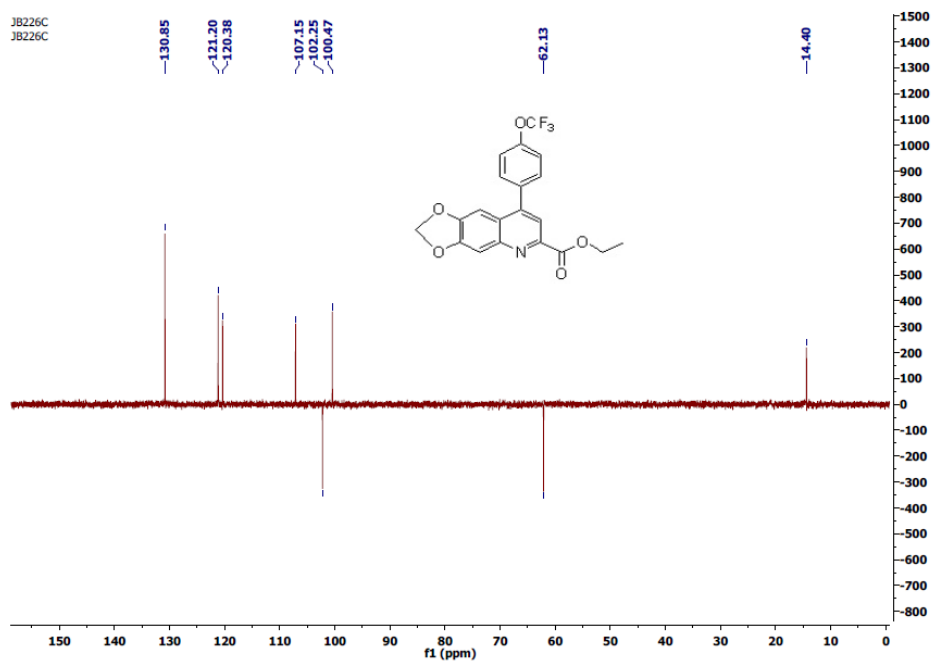

07-aug-mcd-2a  
JB226C

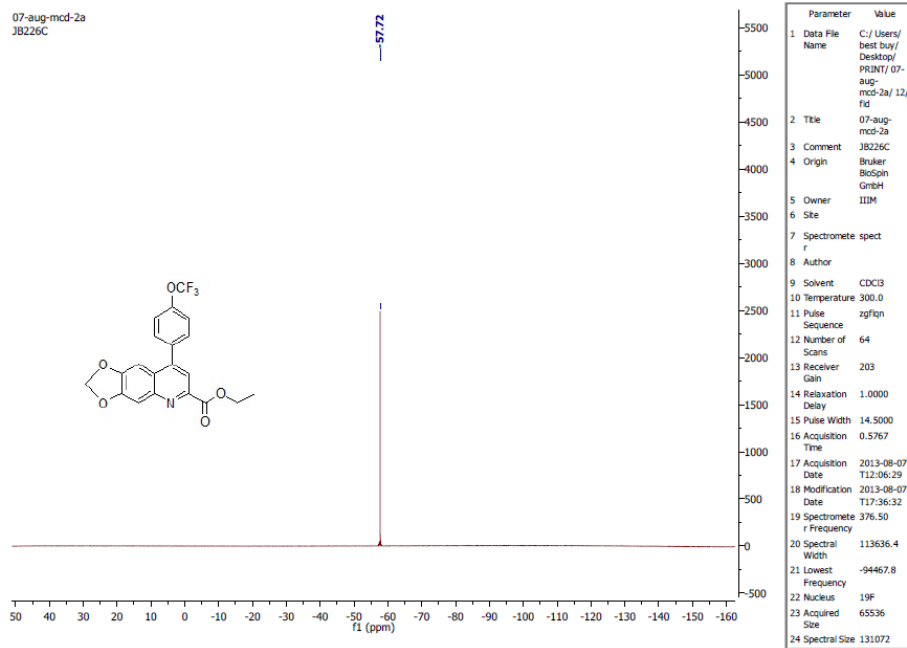

**S3.p.**  $^1\text{H}$ ,  $^{13}\text{C}$  and DEPT-135 NMR spectrum of ethyl 6,7-dimethoxy-4-phenylquinoline-2-carboxylate (**1p**)

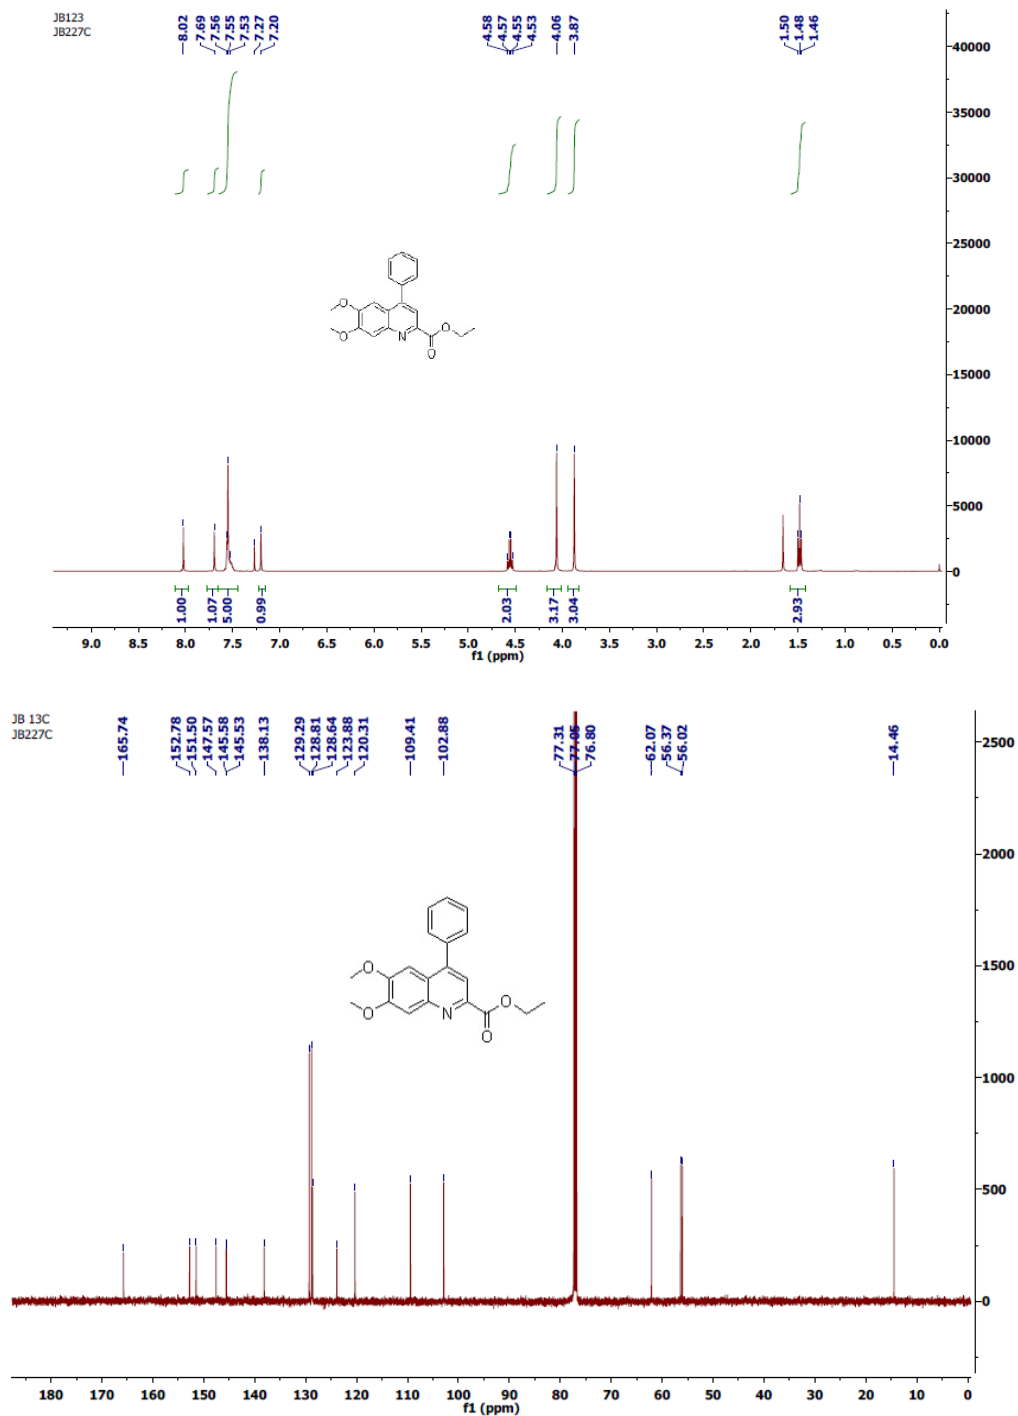

JB 13C  
JB227C

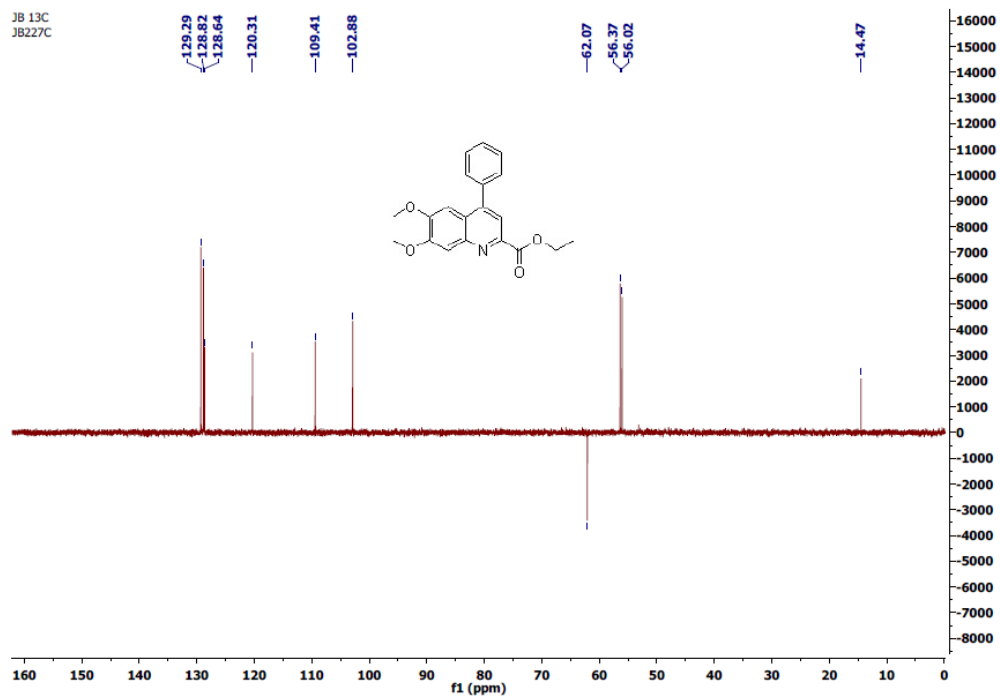

**S3.q.**  $^1\text{H}$ ,  $^{13}\text{C}$  and DEPT-135 NMR spectrum of ethyl 4-(3-chlorophenyl)-6,7-dimethoxyquinoline-2-carboxylate (**1q**)

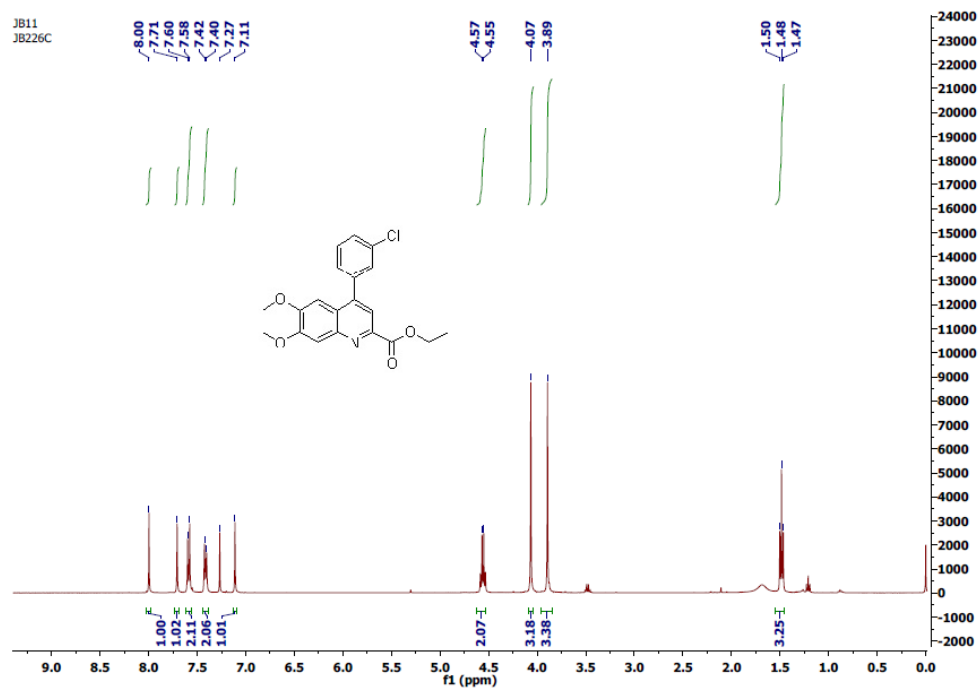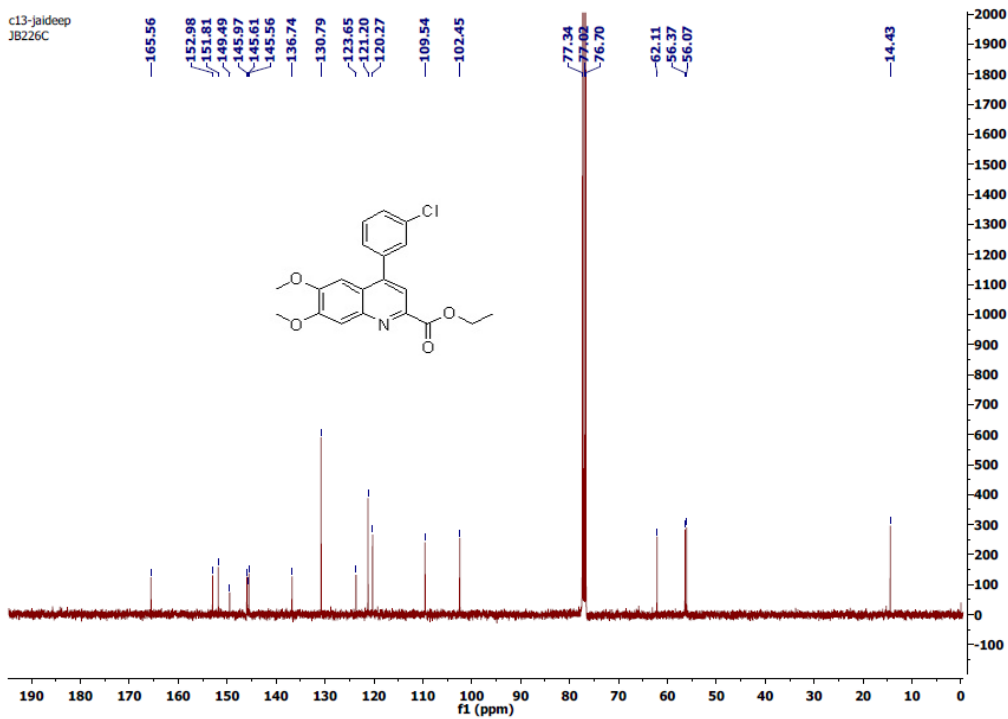

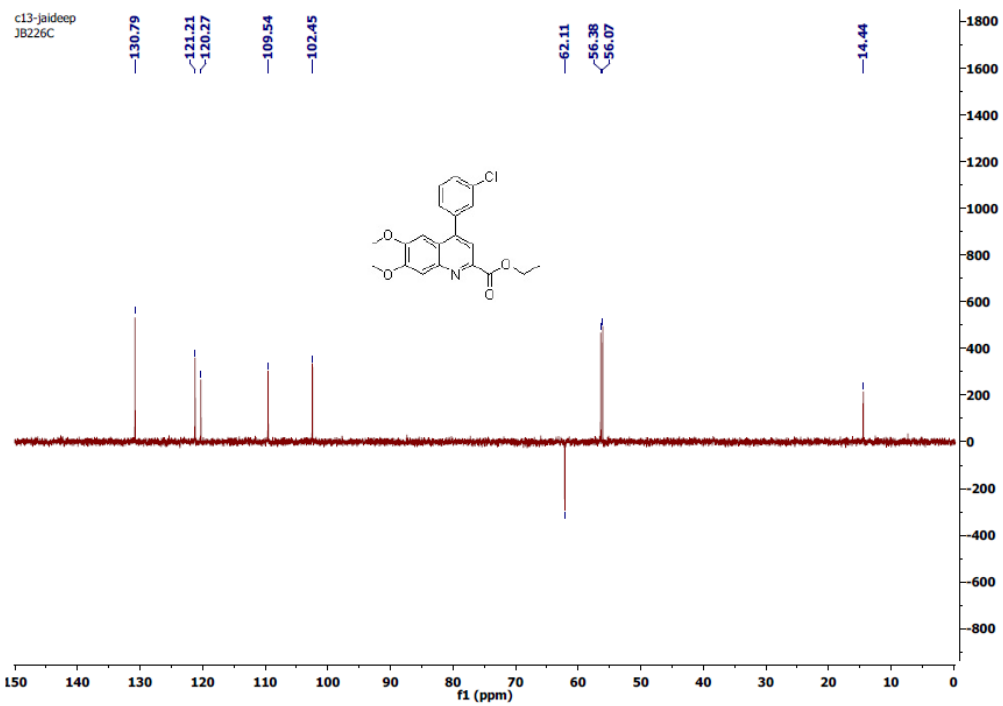

**S4.r.**  $^1\text{H}$ ,  $^{13}\text{C}$  and DEPT-135 NMR spectrum of ethyl 6-(benzyloxy)-4-phenylquinoline-2-carboxylate (**1r**)

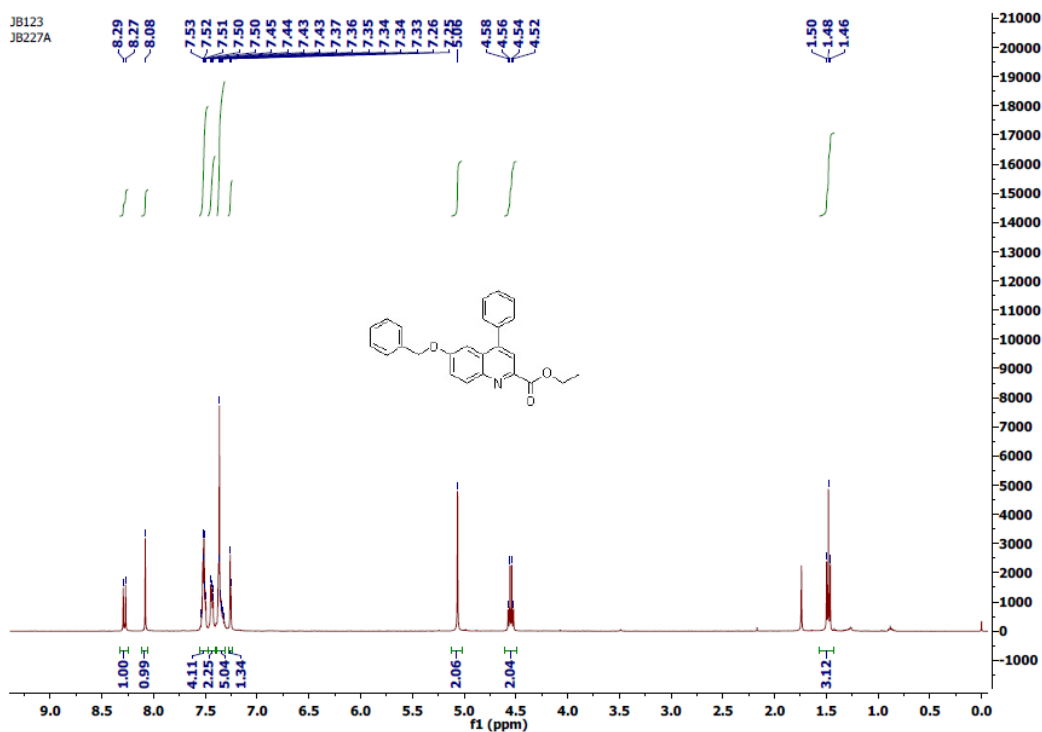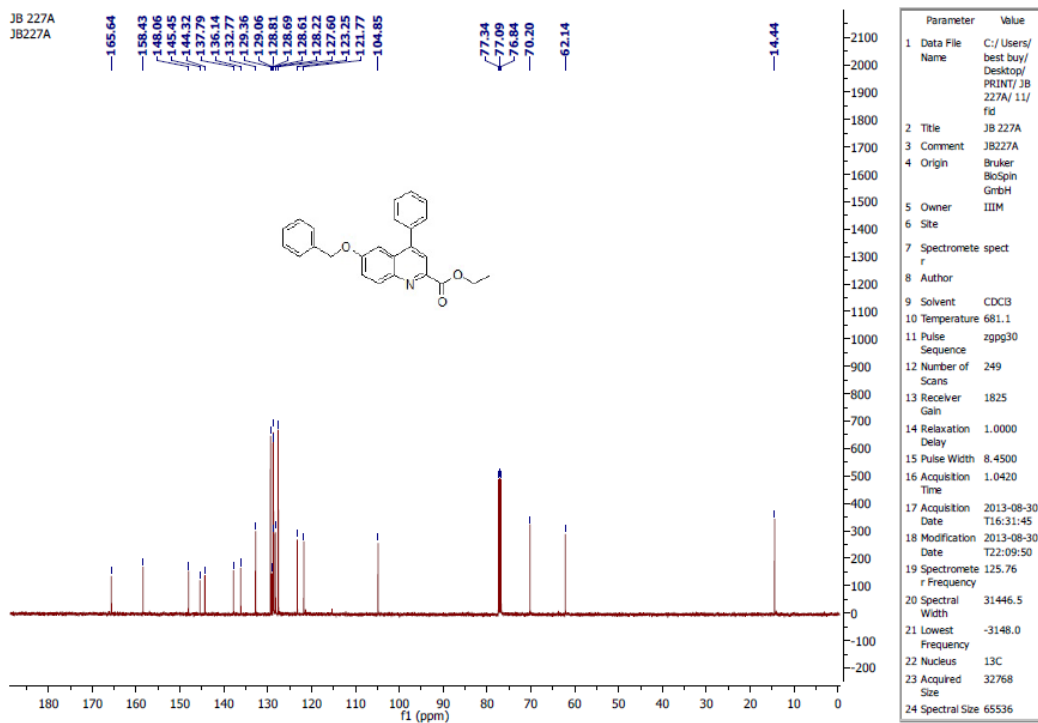

JB 227A  
JB227A

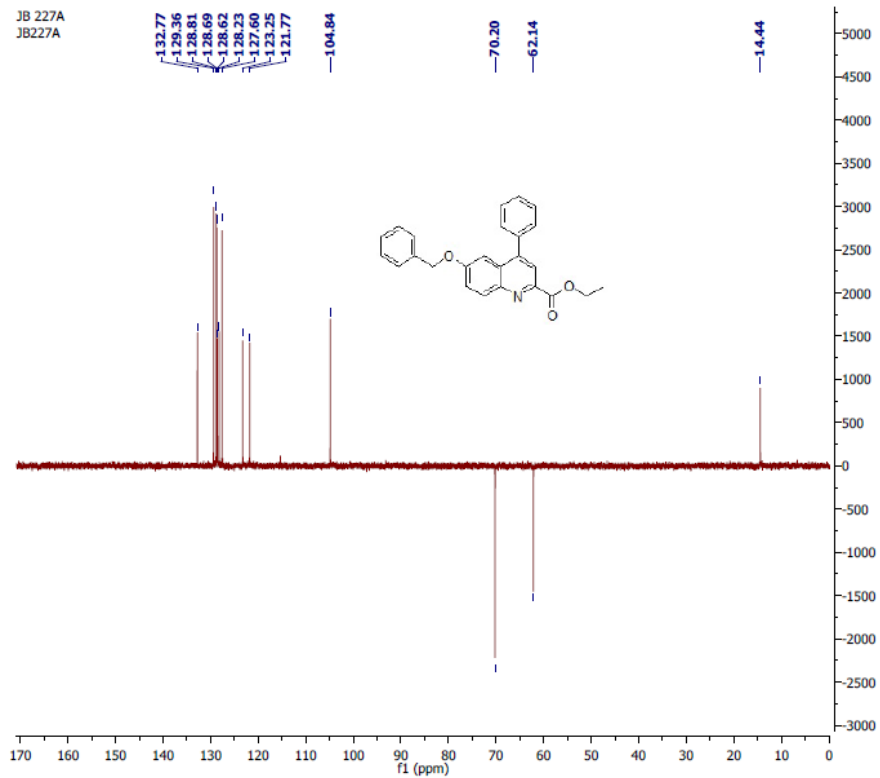

| Parameter                 | Value                                            |
|---------------------------|--------------------------------------------------|
| 1 Data File Name          | C:/Users/best buy/Desktop/PRINT/ JB 227A/ 12/ f1 |
| 2 Title                   | JB 227A                                          |
| 3 Comment                 | JB227A                                           |
| 4 Origin                  | UXNMR, Bruker Analytische Messtechnik GmbH       |
| 5 Owner                   | root                                             |
| 6 Site                    |                                                  |
| 7 Spectrometer            | spect r                                          |
| 8 Author                  |                                                  |
| 9 Solvent                 | CDCB                                             |
| 10 Temperature            | 681.0                                            |
| 11 Pulse Sequence         | dept135                                          |
| 12 Number of Scans        | 100                                              |
| 13 Receiver Gain          | 16384                                            |
| 14 Relaxation Delay       | 1.0000                                           |
| 15 Pulse Width            | 8.4500                                           |
| 16 Acquisition Time       | 1.0912                                           |
| 17 Acquisition Date       | 2013-08-30T 16:43:43                             |
| 18 Modification Date      | 2013-08-30T 22:13:50                             |
| 19 Spectrometer Frequency | 125.76                                           |
| 20 Spectral Width         | 30030.0                                          |
| 21 Lowest Frequency       | -2439.7                                          |
| 22 Nucleus                | 13C                                              |
| 23 Acquired Size          | 32768                                            |
| 24 Spectral Size          | 65536                                            |

**S4.s.**  $^1\text{H}$ ,  $^{13}\text{C}$  and DEPT-135 NMR spectrum of ethyl 6-(benzyloxy)-4-(3-chlorophenyl)quinoline-2-carboxylate (**1s**)

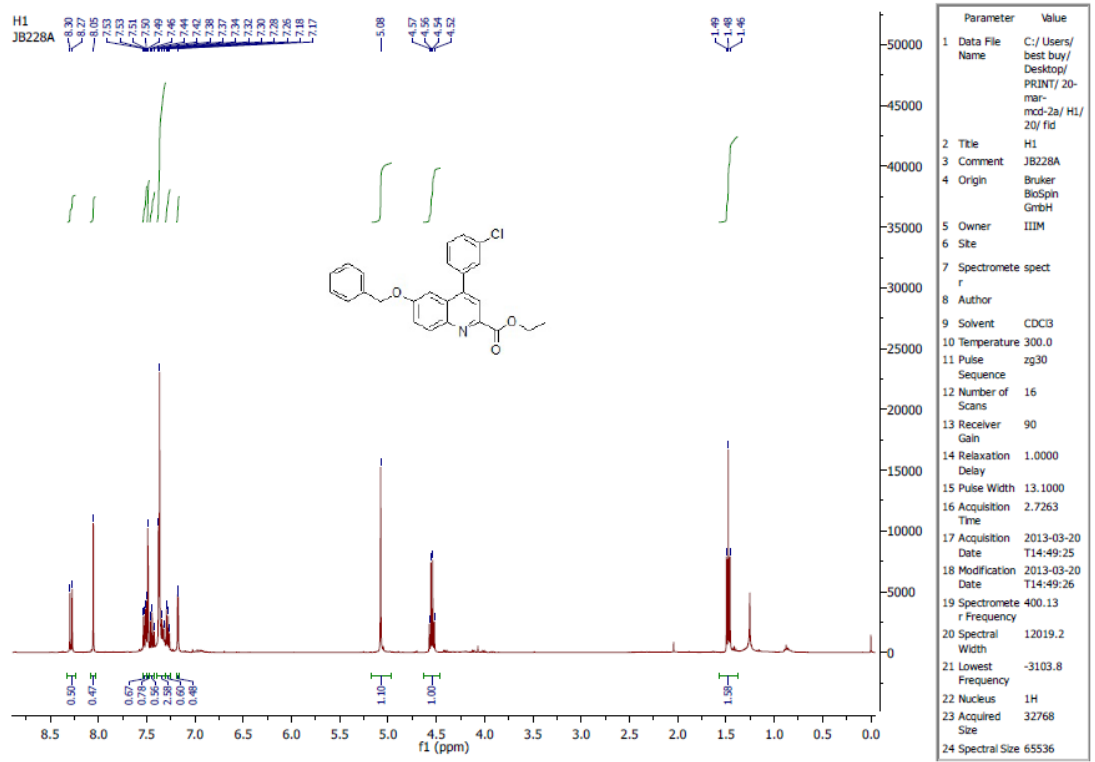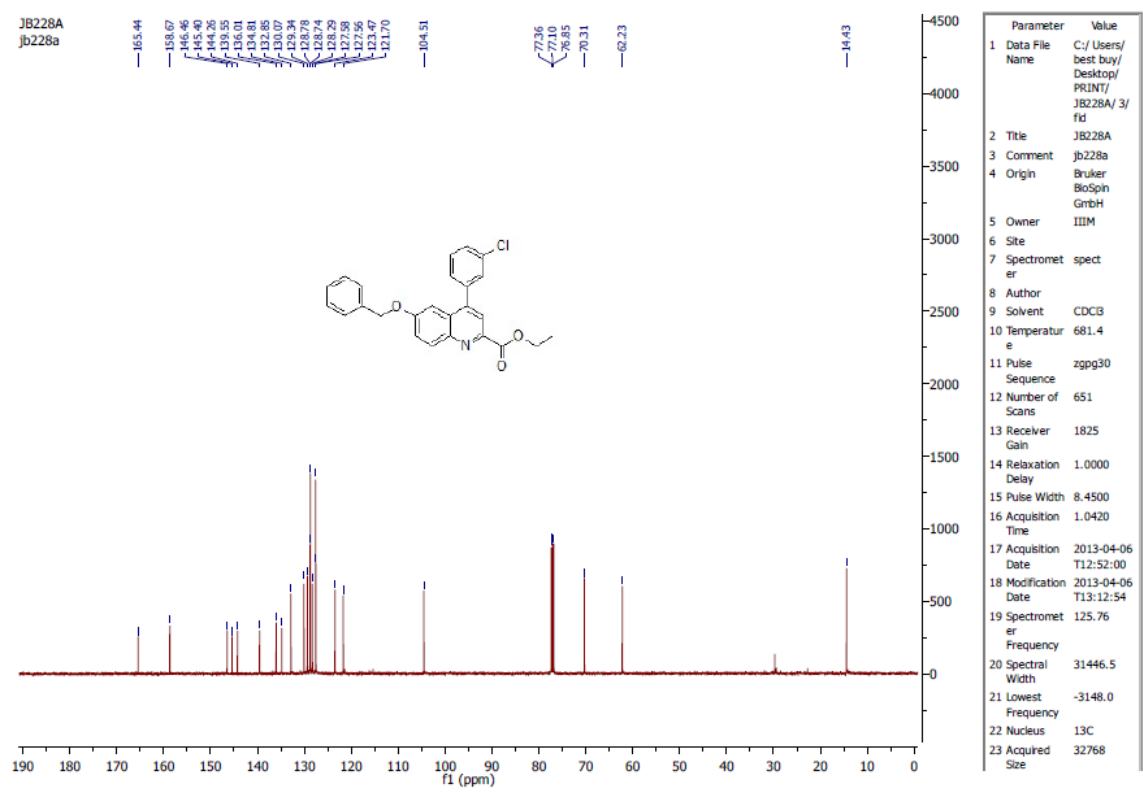



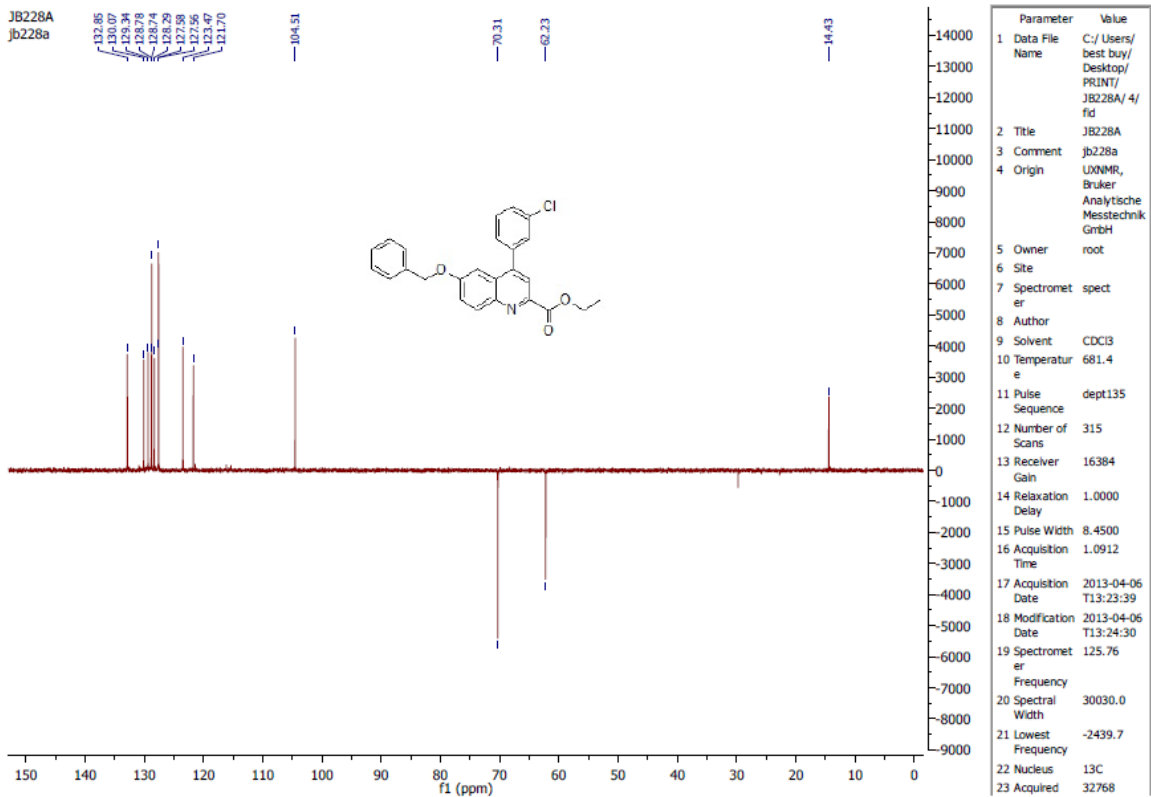

**S4.t.**  $^1\text{H}$ ,  $^{13}\text{C}$ , DEPT-135 and  $^{19}\text{F}$  NMR spectrum of ethyl 6-(benzyloxy)-4-(4-fluorophenyl)quinoline-2-carboxylate (**1t**)

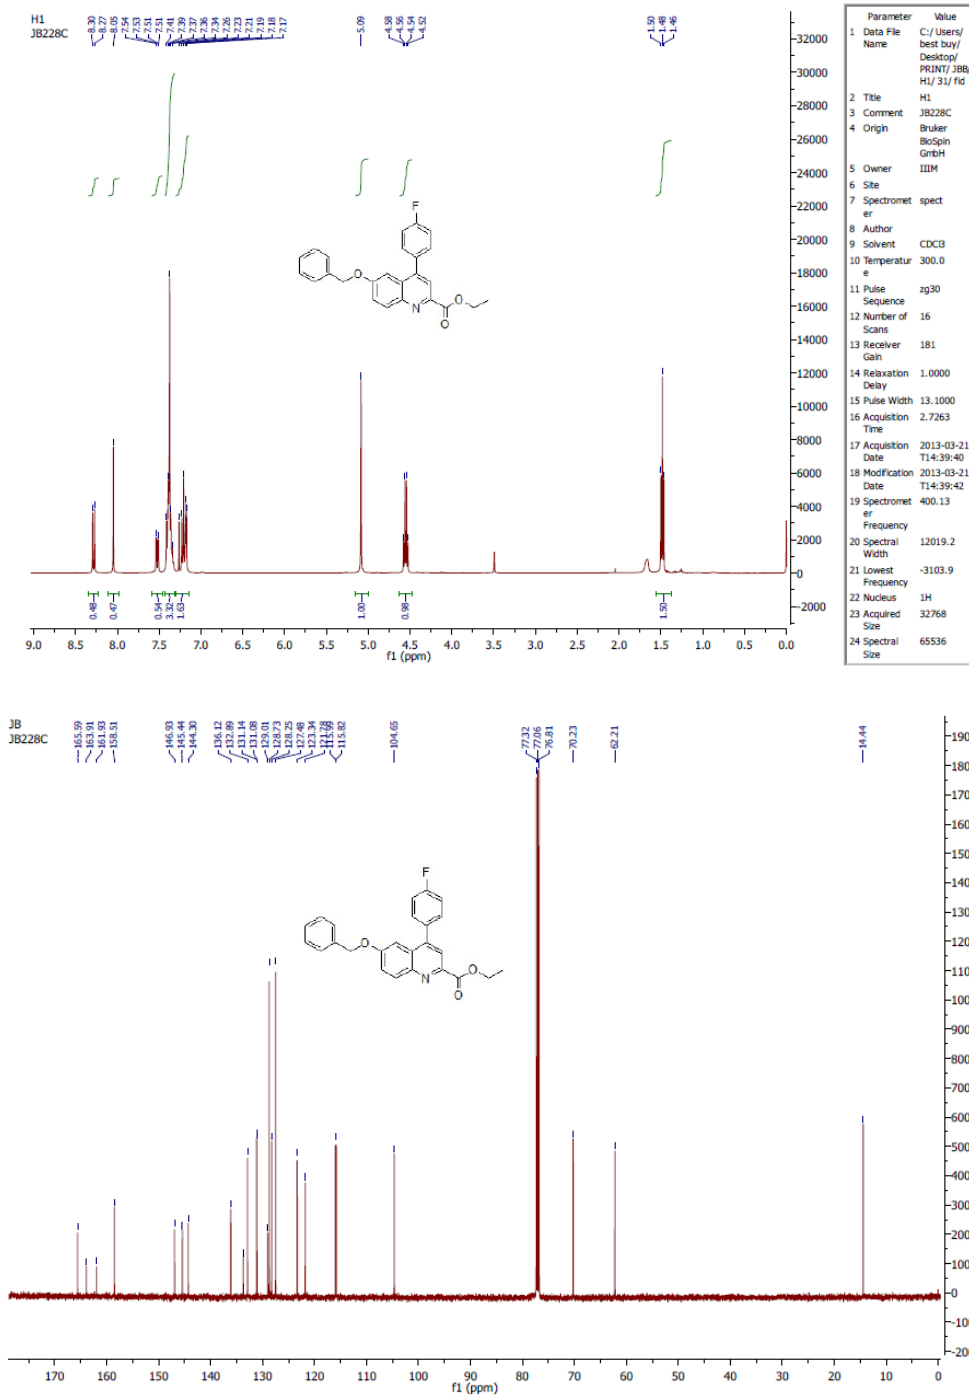

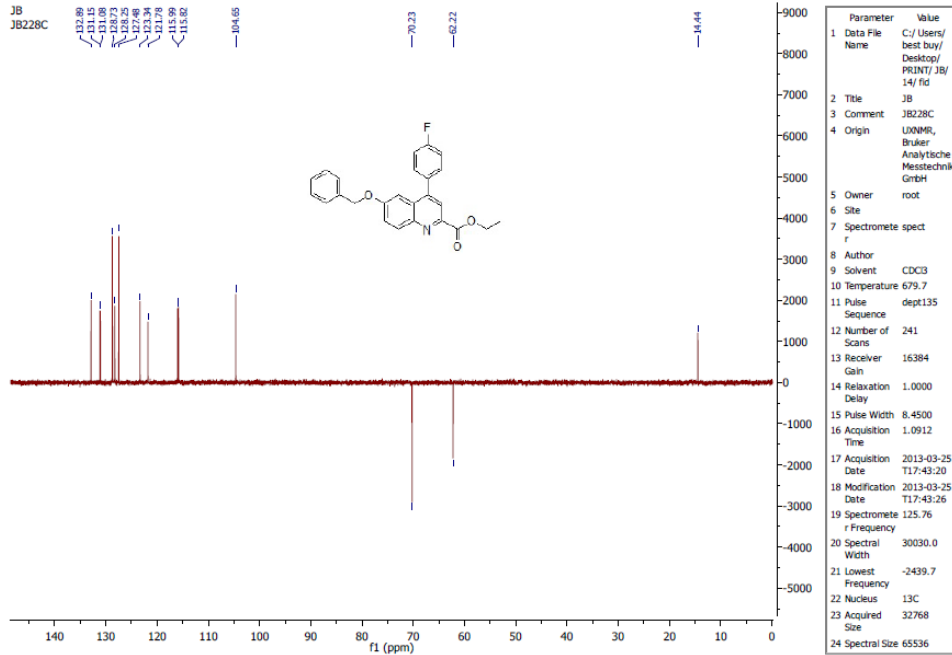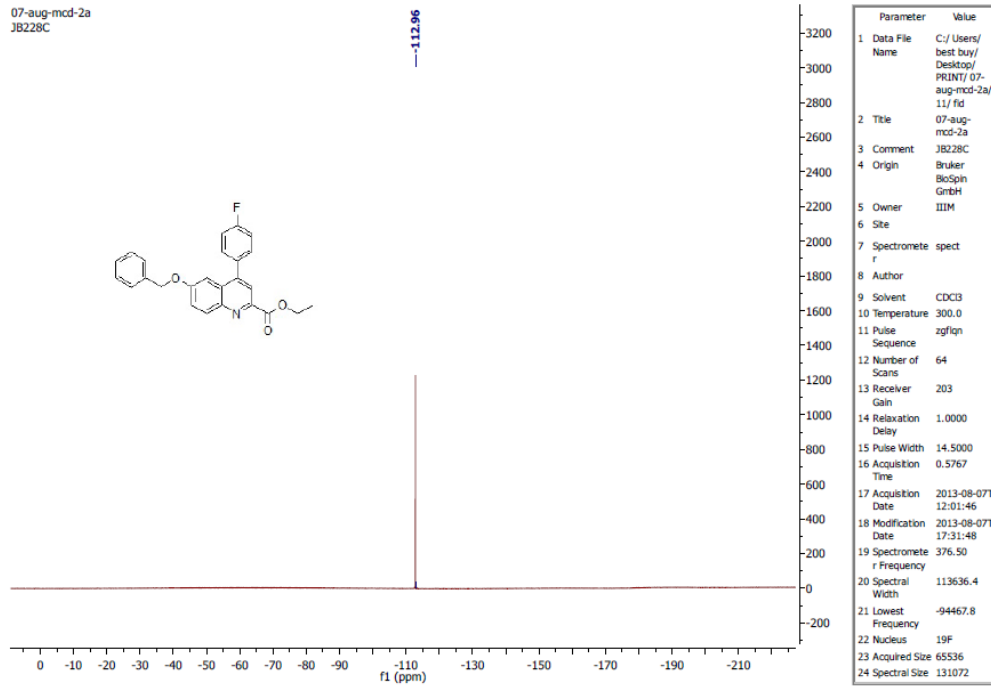

## S2. Redox potential measurement of compound 1o

### S2a. Cyclic voltammogram trace of compound 1o

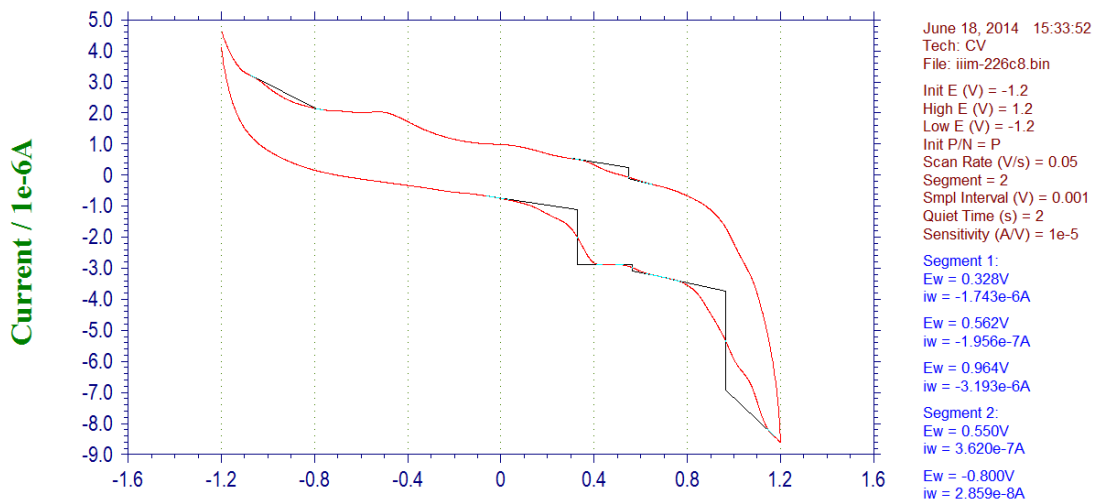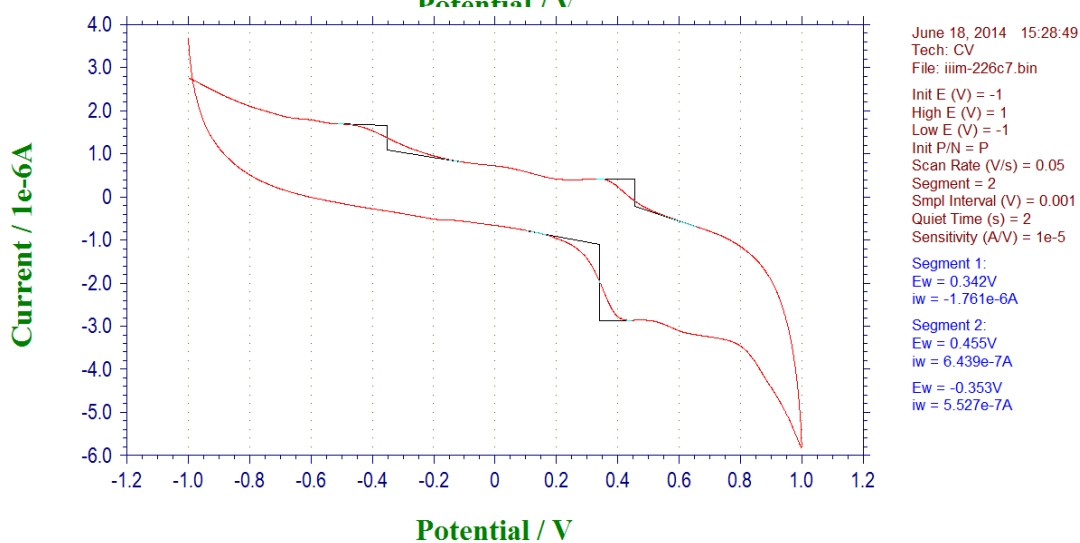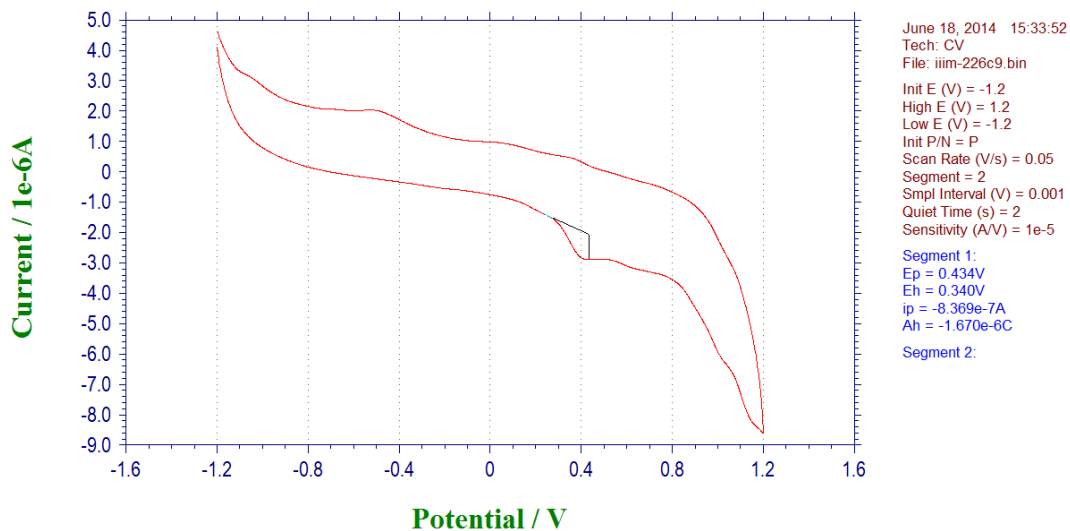

S2b. Cyclic voltammogram trace of tetrabutylammonium perchlorate (ACN)

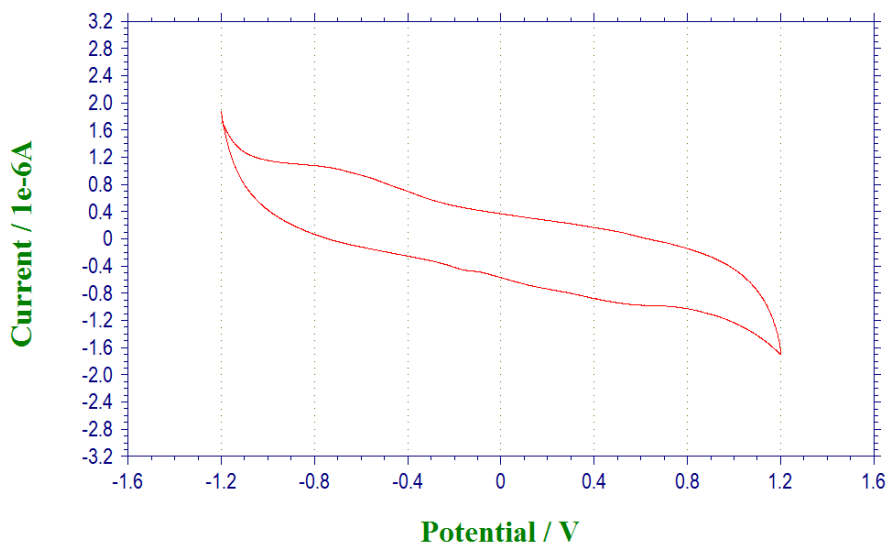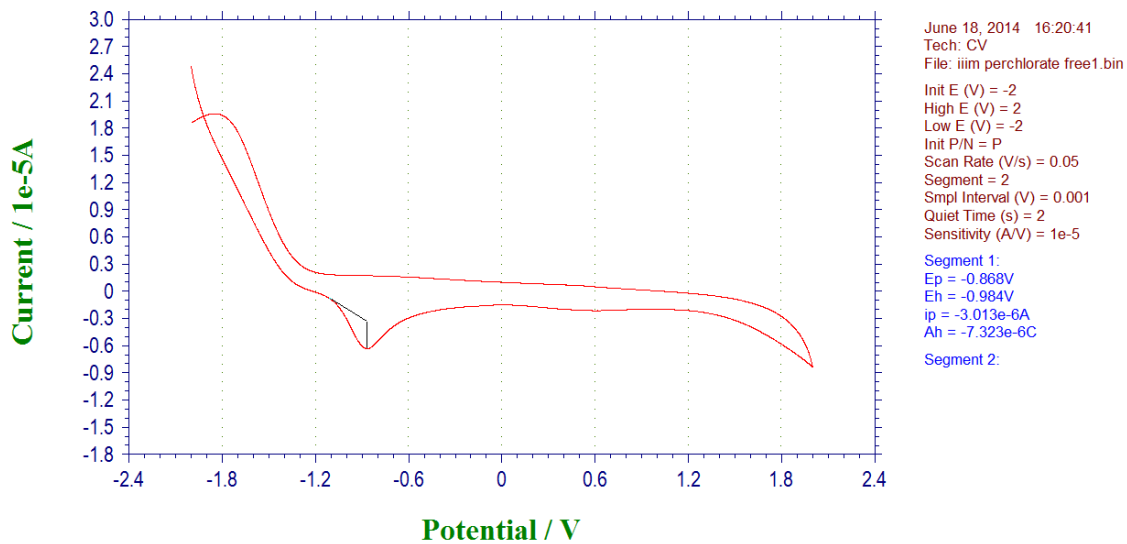

### S3. LCMS analysis of the reaction mixture

The reaction was carried out using optimized reaction conditions (Entry 16 of Table 1). The LCMS analysis was done after 45 min reaction time.

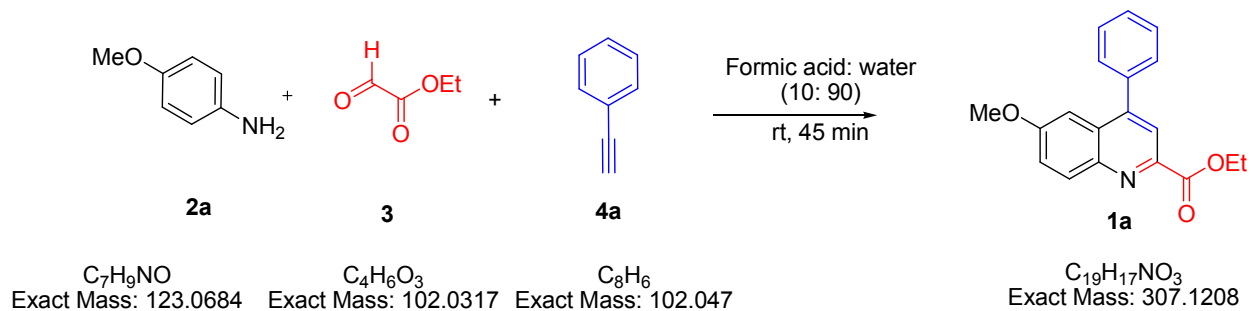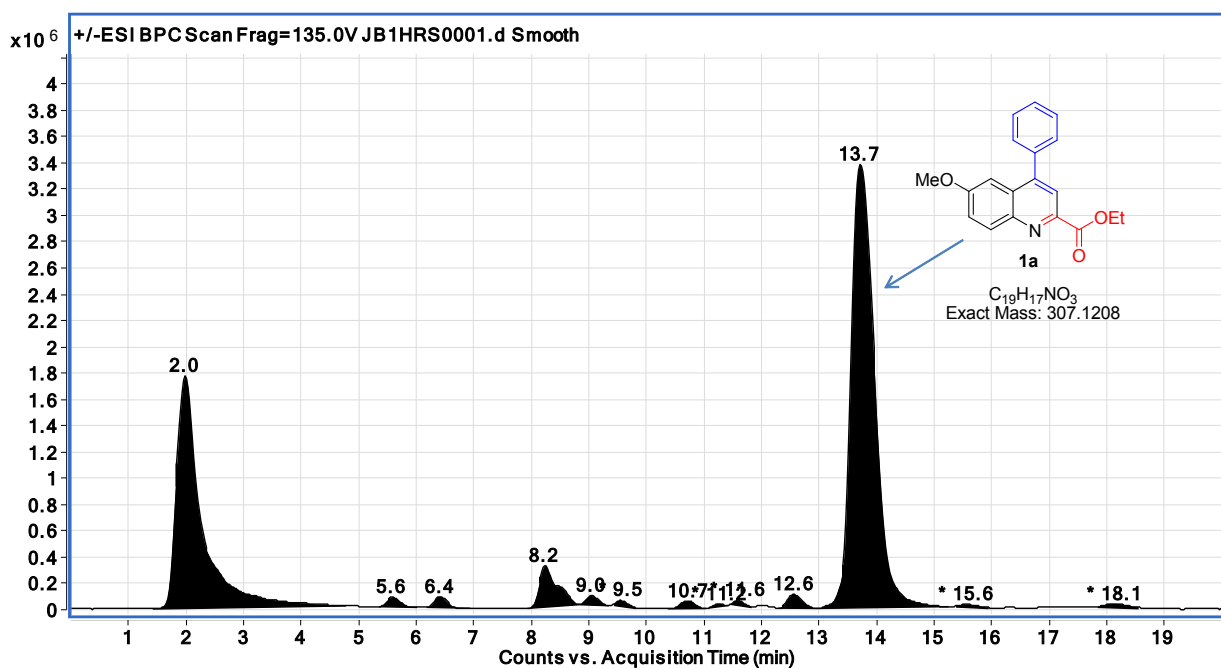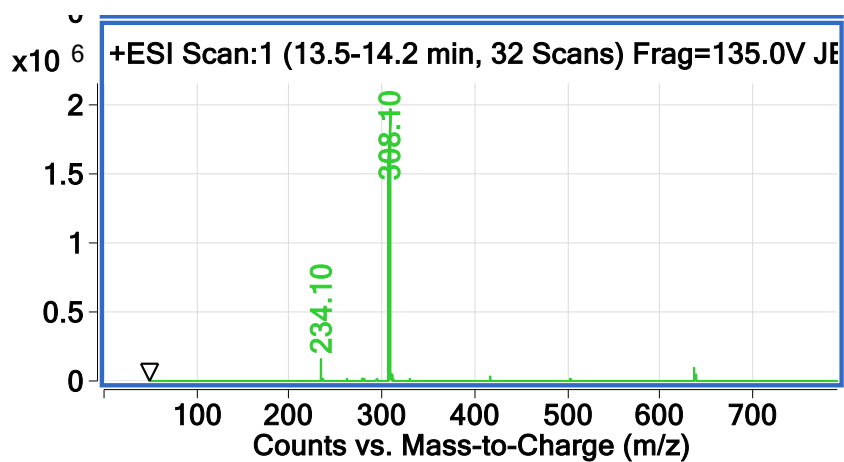

LC-ESI-MS/MS analysis was carried out on Agilent Triple-Quad LC-MS/MS system (model 6410). Liquid chromatography analyses were carried out using an Agilent 1260 Infinity (Agilent, USA) quaternary pump equipped with an autosampler, column heater and online degasser. A Chromolith C<sub>18</sub> (Merck, Germany) column (55 x 4.6 mm) was used at 30 °C temperature and the injection volume was 10 µl. The elution was carried out with binary solvent system consisting of 0.1% formic acid in water (solvent A) and acetonitrile (solvent B) at a constant flow-rate of 0.5 ml/min. The gradient elution was used, as depicted in Table S1-a.

**Table S1-a.** Gradient details used in LC-ESI-MS/MS analysis

| Time | Solvent A (water) | Solvent B (acetonitrile) | Flow rate (ml/min) |
|------|-------------------|--------------------------|--------------------|
| 0    | 90                | 10                       | 0.5                |
| 10   | 40                | 60                       | 0.5                |
| 15   | 40                | 60                       | 0.5                |
| 17   | 90                | 10                       | 0.5                |
| 20   | 90                | 10                       | 0.5                |

**Table S1-b.** Instrument parameters during LC-ESI-MS analysis

| Source parameters  |          | Autosampler parameters |            | Quaternary pump parameters |            |
|--------------------|----------|------------------------|------------|----------------------------|------------|
| Gas Temp.          | 300 °C   | Injection volume       | 10 µl      | Run time                   | 20 min     |
| Gas flow           | 12 L/min | Eject speed            | 200 µl/min | Flow rate                  | 0.5 ml/min |
| Nebulizer pressure | 50 psi   | Draw speed             | 200 µl/min | Elution                    | Gradient*  |
| Capillary voltage  | 4000 v   |                        |            |                            |            |
| Cell Acc (v)       | 7 v      |                        |            |                            |            |

\* Gradient system is provided in Table S1-a
